# Supplementary material for: Proteomic Analysis of the Breast Cancer Brain Metastasis Microenvironment
Source: Int J Mol Sci. 2019 May 22;20(10):2524. doi: 10.3390/ijms20102524 (PMC6567270; doi:10.3390/ijms20102524)
Supplement: Supplementary file 1 [file ijms-20-02524-s001.zip › ijms-484609 suppl.xlsx]

## Sheet: Table S1_Differential proteins
Gene.name	Uniprot.Accession	FC	P.Value	Name	STRING description
Rras2	P62071	0.223799	1.86139e-06	Ras-related protein R-Ras2	Ras-related protein R-Ras2; It is a plasma membrane-associated GTP-binding protein with GTPase activity. Might transduce growth inhibitory signals across the cell membrane, exerting its effect through an effector shared with the Ras proteins but in an antagonistic fashion (204 aa)
Senp7	Q9CRF0	11.3344	2.39339e-05	Sentrin-specific protease 7 (Fragment)	Sentrin-specific protease 7; Protease that deconjugates SUMO2 and SUMO3 from targeted proteins, but not SUMO1. Catalyzes the deconjugation of poly-SUMO2 and poly-SUMO3 chains. Has very low efficiency in processing full- length SUMO proteins to their mature forms (1037 aa)
Arhgdia	Q99PT1	0.438732	6.45847e-05	Rho GDP-dissociation inhibitor 1 (Rho GDI 1) (GDI-1) (Rho-GDI alpha)	Rho GDP-dissociation inhibitor 1; Controls Rho proteins homeostasis. Regulates the GDP/GTP exchange reaction of the Rho proteins by inhibiting the dissociation of GDP from them, and the subsequent binding of GTP to them. Retains Rho proteins such as CDC42, RAC1 and RHOA in an inactive cytosolic pool, regulating their stability and protecting them from degradation. Actively involved in the recycli…
Erlin2	A0A1B0GT70	0.267493	0.000364198	Erlin-2 (Fragment)	Erlin-2; Component of the ERLIN1/ERLIN2 complex which mediates the endoplasmic reticulum-associated degradation (ERAD) of inositol 1,4,5-trisphosphate receptors (IP3Rs) such as ITPR1. Promotes sterol-accelerated ERAD of HMGCR probably implicating an AMFR/gp78-containing ubiquitin ligase complex. Involved in regulation of cellular cholesterol homeostasis by regulation the SREBP signaling pathway. …
Lims1	Q9D7B2	4.89123	0.000488789	LIM and senescent cell antigen-like-containing domain protein	LIM and senescent cell antigen-like-containing domain protein 1; Adapter protein in a cytoplasmic complex linking beta- integrins to the actin cytoskeleton, bridges the complex to cell surface receptor tyrosine kinases and growth factor receptors. Involved in the regulation of cell survival, cell proliferation and cell differentiation (337 aa)
Hint3	Q9CPS6	4.29216	0.000584608	Histidine triad nucleotide-binding protein 3 (HINT-3) (EC 3.-.-.-) (HINT-4)	Histidine triad nucleotide-binding protein 3; Hydrolyzes phosphoramidate and acyl-adenylate substrates (165 aa)
Aifm1	B1AU25	2.35712	0.000698311	Apoptosis-inducing factor 1; mitochondrial	Apoptosis-inducing factor 1, mitochondrial; Functions both as NADH oxidoreductase and as regulator of apoptosis. In response to apoptotic stimuli, it is released from the mitochondrion intermembrane space into the cytosol and to the nucleus, where it functions as a proapoptotic factor in a caspase-independent pathway. In contrast, functions as an antiapoptotic factor in normal mitochondria via it…
Hibch	Q8QZS1	13.4722	0.000724477	3-hydroxyisobutyryl-CoA hydrolase; mitochondrial (EC 3.1.2.4) (3-hydroxyisobutyryl-coenzyme A hydrolase) (HIB-CoA hydrolase) (HIBYL-CoA-H)	3-hydroxyisobutyryl-CoA hydrolase, mitochondrial; Hydrolyzes 3-hydroxyisobutyryl-CoA (HIBYL-CoA), a saline catabolite. Has high activity toward isobutyryl-CoA. Could be an isobutyryl-CoA dehydrogenase that functions in valine catabolism. Also hydrolyzes 3-hydroxypropanoyl-CoA (By similarity); Belongs to the enoyl-CoA hydratase/isomerase family (385 aa)
Aldh1l1	Q8R0Y6	0.413629	0.000850949	Cytosolic 10-formyltetrahydrofolate dehydrogenase (10-FTHFDH) (FDH) (EC 1.5.1.6) (Aldehyde dehydrogenase family 1 member L1)	Cytosolic 10-formyltetrahydrofolate dehydrogenase; Aldehyde dehydrogenase 1 family, member L1; In the N-terminal section; belongs to the GART family (902 aa)
Slc2a1	P17809	0.440865	0.00100661	Solute carrier family 2; facilitated glucose transporter member 1 (Glucose transporter type 1; erythrocyte/brain) (GLUT-1) (GT1)	Solute carrier family 2, facilitated glucose transporter member 1; Facilitative glucose transporter. This isoform may be responsible for constitutive or basal glucose uptake. Has a very broad substrate specificity; can transport a wide range of aldoses including both pentoses and hexoses; Belongs to the major facilitator superfamily. Sugar transporter (TC 2.A.1.1) family. Glucose transporter subf…
Slc3a2	P10852	0.46823	0.00130072	4F2 cell-surface antigen heavy chain (4F2hc) (Solute carrier family 3 member 2) (CD antigen CD98)	4F2 cell-surface antigen heavy chain; Required for the function of light chain amino-acid transporters. Involved in sodium-independent, high-affinity transport of large neutral amino acids such as phenylalanine, tyrosine, leucine, arginine and tryptophan. Involved in guiding and targeting of LAT1 and LAT2 to the plasma membrane. When associated with SLC7A6 or SLC7A7 acts as an arginine/glutamine …
Ddx39b	G3UXI6	0.401851	0.00147596	Spliceosome RNA helicase Ddx39b (Fragment)	Spliceosome RNA helicase Ddx39b; Involved in nuclear export of spliced and unspliced mRNA. Assembling component of the TREX complex which is thought to couple mRNA transcription, processing and nuclear export, and specifically associates with spliced mRNA and not with unspliced pre-mRNA. TREX is recruited to spliced mRNAs by a transcription- independent mechanism, binds to mRNA upstream of the ex…
Plgrkt	Q9D3P8	3.52613	0.00184927	Plasminogen receptor (KT) (Plg-R(KT))	Plasminogen receptor (KT); Receptor for plasminogen. Regulates urokinase plasminogen activator-dependent and stimulates tissue-type plasminogen activator-dependent cell surface plasminogen activation. Proposed to be part of a local catecholaminergic cell plasminogen activation system that regulates neuroendocrine prohormone processing. Involved in regulation of inflammatory response; regulates mo…
Rpl18	A0A1B0GSS8	5.91571	0.00210614	60S ribosomal protein L18	60S ribosomal protein L18; Component of the large ribosomal subunit (188 aa)
Cldn11	Q60771	0.208679	0.00215203	Claudin-11 (Oligodendrocyte transmembrane protein) (Oligodendrocyte-specific protein)	Claudin-11; Plays a major role in tight junction-specific obliteration of the intercellular space, through calcium- independent cell-adhesion activity; Belongs to the claudin family (207 aa)
Ccdc12	A0A0G2JFK6	11.3849	0.0022207	Coiled-coil domain-containing protein 12 (Fragment)	Coiled-coil domain containing 12 (166 aa)
Park7	A2A813	0.340226	0.00245341	Protein DJ-1	Protein/nucleic acid deglycase DJ-1; Protein and nucleotide deglycase that catalyzes the deglycation of the Maillard adducts formed between amino groups of proteins or nucleotides and reactive carbonyl groups of glyoxals. Thus, functions as a protein deglycase that repairs methylglyoxal- and glyoxal-glycated proteins, and releases repaired proteins and lactate or glycolate, respectively. Deglycat…
Ap4e1	H3BL03	0.298305	0.00250941	AP-4 complex subunit epsilon-1	AP-4 complex subunit epsilon-1; Component of the adaptor protein complex 4 (AP-4). Adaptor protein complexes are vesicle coat components involved both in vesicle formation and cargo selection. They control the vesicular transport of proteins in different trafficking pathways. AP-4 forms a non clathrin-associated coat on vesicles departing the trans-Golgi network (TGN) and may be involved in the t…
Ndufa11	G5E814	2.58752	0.00258737	MCG5603 (NADH dehydrogenase [ubiquinone] 1 alpha subcomplex subunit 11)	NADH dehydrogenase [ubiquinone] 1 alpha subcomplex subunit 11; Accessory subunit of the mitochondrial membrane respiratory chain NADH dehydrogenase (Complex I), that is believed not to be involved in catalysis. Complex I functions in the transfer of electrons from NADH to the respiratory chain. The immediate electron acceptor for the enzyme is believed to be ubiquinone (143 aa)
Prep	Q9QUR6	2.30836	0.00278565	Prolyl endopeptidase (PE) (EC 3.4.21.26) (Post-proline cleaving enzyme)	Prolyl endopeptidase; Cleaves peptide bonds on the C-terminal side of prolyl residues within peptides that are up to approximately 30 amino acids long (710 aa)
Lars	Q8BMJ2	5.33261	0.00285902	Leucine--tRNA ligase; cytoplasmic (EC 6.1.1.4) (Leucyl-tRNA synthetase) (LeuRS)	Leucine--tRNA ligase, cytoplasmic; leucyl-tRNA synthetase; Belongs to the class-I aminoacyl-tRNA synthetase family (1178 aa)
Dpp3	Q99KK7	4.91982	0.0029844	Dipeptidyl peptidase 3 (EC 3.4.14.4) (Dipeptidyl aminopeptidase III) (Dipeptidyl arylamidase III) (Dipeptidyl peptidase III) (DPP III) (Enkephalinase B)	Dipeptidyl peptidase 3; Cleaves and degrades bioactive peptides, including angiotensin, Leu-enkephalin and Met-enkephalin. Also cleaves Arg- Arg-beta-naphthylamide (in vitro); Belongs to the peptidase M49 family (738 aa)
Dnajc6	Q80TZ3	2.83815	0.00299873	Putative tyrosine-protein phosphatase auxilin (EC 3.1.3.48) (DnaJ homolog subfamily C member 6)	Putative tyrosine-protein phosphatase auxilin; Recruits HSPA8/HSC70 to clathrin-coated vesicles and promotes uncoating of clathrin-coated vesicles. Plays a role in clathrin-mediated endocytosis in neurons (938 aa)
Hyi	E9QLT0	3.24005	0.00331796	Putative hydroxypyruvate isomerase (EC 5.3.1.22)	Putative hydroxypyruvate isomerase; Catalyzes the reversible isomerization between hydroxypyruvate and 2-hydroxy-3-oxopropanoate (also termed tartronate semialdehyde) (267 aa)
Lamp2	P17047	2.41772	0.00353867	Lysosome-associated membrane glycoprotein 2 (LAMP-2) (Lysosome-associated membrane protein 2) (CD107 antigen-like family member B) (Lysosomal membrane glycoprotein type B) (LGP-B) (CD antigen CD107b)	Lysosome-associated membrane glycoprotein 2; Plays an important role in chaperone-mediated autophagy, a process that mediates lysosomal degradation of proteins in response to various stresses and as part of the normal turnover of proteins with a long biological half-live. Functions by binding target proteins, such as GAPDH and MLLT11, and targeting them for lysosomal degradation (By similarity). …
Spta1	P08032	3.0023	0.00361008	Spectrin alpha chain; erythrocytic 1 (Erythroid alpha-spectrin)	Spectrin alpha chain, erythrocytic 1; Spectrin is the major constituent of the cytoskeletal network underlying the erythrocyte plasma membrane. It associates with band 4.1 and actin to form the cytoskeletal superstructure of the erythrocyte plasma membrane (2415 aa)
Hist1h1c	P15864	0.413723	0.00417068	Histone H1.2 (H1 VAR.1) (H1c)	Histone H1.2; Histone H1 protein binds to linker DNA between nucleosomes forming the macromolecular structure known as the chromatin fiber. Histones H1 are necessary for the condensation of nucleosome chains into higher-order structured fibers. Acts also as a regulator of individual gene transcription through chromatin remodeling, nucleosome spacing and DNA methylation (By similarity) (212 aa)
Phgdh	Q61753	0.623057	0.00430121	D-3-phosphoglycerate dehydrogenase (3-PGDH) (EC 1.1.1.95) (A10)	D-3-phosphoglycerate dehydrogenase; Catalyzes the reversible oxidation of 3-phospho-D- glycerate to 3-phosphonooxypyruvate, the first step of the phosphorylated L-serine biosynthesis pathway. Does not catalyze the reversible oxidation of 2-hydroxyglutarate to 2-oxoglutarate and the reversible oxidation of (S)-malate to oxaloacetate (533 aa)
Car4	Q64444	0.253871	0.00502818	Carbonic anhydrase 4 (EC 4.2.1.1) (Carbonate dehydratase IV) (Carbonic anhydrase IV) (CA-IV)	Carbonic anhydrase 4; Reversible hydration of carbon dioxide. May stimulate the sodium/bicarbonate transporter activity of SLC4A4 (By similarity) (305 aa)
Dpysl4	Q3TMU8	2.00145	0.0051275	Dihydropyrimidinase-like 4 (Dihydropyrimidinase-related protein 4)	Dihydropyrimidinase-related protein 4; Necessary for signaling by class 3 semaphorins and subsequent remodeling of the cytoskeleton. Plays a role in axon guidance, neuronal growth cone collapse and cell migration (By similarity); Belongs to the metallo-dependent hydrolases superfamily. Hydantoinase/dihydropyrimidinase family (572 aa)
Mapk1	F6VEI7	0.309832	0.00514563	Mitogen-activated protein kinase 1 (Fragment)	Mitogen-activated protein kinase 1; Serine/threonine kinase which acts as an essential component of the MAP kinase signal transduction pathway. MAPK1/ERK2 and MAPK3/ERK1 are the 2 MAPKs which play an important role in the MAPK/ERK cascade. They participate also in a signaling cascade initiated by activated KIT and KITLG/SCF. Depending on the cellular context, the MAPK/ERK cascade mediates diverse…
Tsg101	A0A1B0GS10	0.292934	0.00606967	Tumor susceptibility gene 101 protein (Fragment)	Tumor susceptibility gene 101 protein; Component of the ESCRT-I complex, a regulator of vesicular trafficking process. Binds to ubiquitinated cargo proteins and is required for the sorting of endocytic ubiquitinated cargos into multivesicular bodies (MVBs). Mediates the association between the ESCRT-0 and ESCRT-I complex. Required for completion of cytokinesis; the function requires CEP55. May be…
Myo18a	K3W4L0	0.282284	0.00630108	Unconventional myosin-XVIIIa	Unconventional myosin-XVIIIa; May link Golgi membranes to the cytoskeleton and participate in the tensile force required for vesicle budding from the Golgi. Thereby, may play a role in Golgi membrane trafficking and could indirectly give its flattened shape to the Golgi apparatus. Alternatively, in concert with LURAP1 and CDC42BPA/CDC42BPB, has been involved in modulating lamellar actomyosin retr…
Arhgap33	A0A140LHW2	0.153749	0.00679465	Rho GTPase-activating protein 33	Rho GTPase-activating protein 33; May be involved in several stages of intracellular trafficking (By similarity). Could play an important role in the regulation of glucose transport by insulin. May act as a downstream effector of RHOQ/TC10 in the regulation of insulin- stimulated glucose transport; Belongs to the PX domain-containing GAP family (1305 aa)
Canx	P35564	0.566477	0.00736673	Calnexin	Calnexin; Calcium-binding protein that interacts with newly synthesized glycoproteins in the endoplasmic reticulum. It may act in assisting protein assembly and/or in the retention within the ER of unassembled protein subunits. It seems to play a major role in the quality control apparatus of the ER by the retention of incorrectly folded proteins. Associated with partial T-cell antigen receptor c…
Sirpb1c	Q1AN90	3.33534	0.0078627	SIRP beta 1 cell surface protein (Signal-regulatory protein beta 1C)	Signal-regulatory protein beta 1C (391 aa)
Atp5a1	D3Z6F5	2.50691	0.00833084	ATP synthase subunit alpha	ATP synthase subunit alpha, mitochondrial; Mitochondrial membrane ATP synthase (F(1)F(0) ATP synthase or Complex V) produces ATP from ADP in the presence of a proton gradient across the membrane which is generated by electron transport complexes of the respiratory chain. F-type ATPases consist of two structural domains, F(1) - containing the extramembraneous catalytic core, and F(0) - containing …
Fabp5	Q05816	0.639881	0.00846537	Fatty acid-binding protein; epidermal (Epidermal-type fatty acid-binding protein) (E-FABP) (Fatty acid-binding protein 5) (Keratinocyte lipid-binding protein) (Psoriasis-associated fatty acid-binding protein homolog) (PA-FABP)	Fatty acid-binding protein, epidermal; High specificity for fatty acids. Highest affinity for C18 chain length (By similarity); Belongs to the calycin superfamily. Fatty-acid binding protein (FABP) family (135 aa)
Mvp	E9Q3X0	0.373187	0.00855226	Major vault protein	Major vault protein; Required for normal vault structure. Vaults are multi- subunit structures that may act as scaffolds for proteins involved in signal transduction. Vaults may also play a role in nucleo- cytoplasmic transport. Down-regulates IFNG-mediated STAT1 signaling and subsequent activation of JAK. Down-regulates SRC activity and signaling through MAP kinases (By similarity) (870 aa)
Map1a	A2ARP8	0.528517	0.00892858	Microtubule-associated protein 1A	Microtubule-associated protein 1A; Structural protein involved in the filamentous cross- bridging between microtubules and other skeletal elements; Belongs to the MAP1 family (3014 aa)
Slc30a1	Q60738	6.95346	0.00912068	Zinc transporter 1 (ZnT-1) (Solute carrier family 30 member 1)	Zinc transporter 1; May be involved in zinc transport out of the cell. Lethality of knockout early in gestation suggests a role of the protein in fetal zinc acquisition and retention; Belongs to the cation diffusion facilitator (CDF) transporter (TC 2.A.4) family. SLC30A subfamily (503 aa)
Tppp	Q7TQD2	0.6384	0.0098465	Tubulin polymerization-promoting protein (TPPP)	Tubulin polymerization-promoting protein; May play a role in the polymerization of tubulin into microtubules, microtubule bundling and the stabilization of existing microtubules, thus maintaining the integrity of the microtubule network. May play a role in mitotic spindle assembly and nuclear envelope breakdown (218 aa)
Immt	E9QAY6	0.515996	0.00999626	MICOS complex subunit MIC60 (Mitofilin)	MICOS complex subunit Mic60; Component of the MICOS complex, a large protein complex of the mitochondrial inner membrane that plays crucial roles in the maintenance of crista junctions, inner membrane architecture, and formation of contact sites to the outer membrane. Plays an important role in the maintenance of the MICOS complex stability and the mitochondrial cristae morphology (757 aa)
Atp1a1	Q8VDN2	0.676263	0.0103326	Sodium/potassium-transporting ATPase subunit alpha-1 (Na(+)/K(+) ATPase alpha-1 subunit) (EC 3.6.3.9) (Sodium pump subunit alpha-1)	Sodium/potassium-transporting ATPase subunit alpha-1; This is the catalytic component of the active enzyme, which catalyzes the hydrolysis of ATP coupled with the exchange of sodium and potassium ions across the plasma membrane. This action creates the electrochemical gradient of sodium and potassium ions, providing the energy for active transport of various nutrients (By similarity); Belongs to …
Krt17	Q9QWL7	0.212279	0.0106146	Keratin; type I cytoskeletal 17 (Cytokeratin-17) (CK-17) (Keratin-17) (K17)	Keratin, type I cytoskeletal 17; Type I keratin involved in the formation and maintenance of various skin appendages, specifically in determining shape and orientation of hair. Required for the correct growth of hair follicles, in particular for the persistence of the anagen (growth) state. Modulates the function of TNF-alpha in the specific context of hair cycling. Regulates protein synthesis an…
H1f0	P10922	0.468369	0.0106461	Histone H1.0 (Histone H1) (Histone H1(0)) (MyD196) [Cleaved into: Histone H1.0; N-terminally processed]	Histone H1.0; Histones H1 are necessary for the condensation of nucleosome chains into higher-order structures. The H1F0 histones are found in cells that are in terminal stages of differentiation or that have low rates of cell division (194 aa)
Vapb	Q8BH80	2.00859	0.0109882	Vesicle-associated membrane protein; associated protein B and C (Vesicle-associated membrane protein-associated protein B)	Vesicle-associated membrane protein-associated protein B; Participates in the endoplasmic reticulum unfolded protein response (UPR) by inducing ERN1/IRE1 activity. Involved in cellular calcium homeostasis regulation (243 aa)
Gng5	Q80SZ7	0.65479	0.0120836	Guanine nucleotide-binding protein G(I)/G(S)/G(O) subunit gamma-5	Guanine nucleotide-binding protein G(I)/G(S)/G(O) subunit gamma-5; Guanine nucleotide-binding proteins (G proteins) are involved as a modulator or transducer in various transmembrane signaling systems. The beta and gamma chains are required for the GTPase activity, for replacement of GDP by GTP, and for G protein- effector interaction (68 aa)
Cox7c	P17665	0.313414	0.0121535	Cytochrome c oxidase subunit 7C; mitochondrial (Cytochrome c oxidase polypeptide VIIc)	Cytochrome c oxidase subunit 7C, mitochondrial; This protein is one of the nuclear-coded polypeptide chains of cytochrome c oxidase, the terminal oxidase in mitochondrial electron transport (63 aa)
Hist1h1b	P43276	0.414419	0.0122362	Histone H1.5 (H1 VAR.5) (H1b)	Histone H1.5; Histone H1 protein binds to linker DNA between nucleosomes forming the macromolecular structure known as the chromatin fiber. Histones H1 are necessary for the condensation of nucleosome chains into higher-order structured fibers. Acts also as a regulator of individual gene transcription through chromatin remodeling, nucleosome spacing and DNA methylation (By similarity) (223 aa)
Sept11	A0A0J9YUL3	2.0729	0.0123856	Septin 11; isoform CRA_b (Septin-11)	Septin-11; Filament-forming cytoskeletal GTPase. May play a role in cytokinesis (Potential). May play a role in the cytoarchitecture of neurons, including dendritic arborization and dendritic spines, and in GABAergic synaptic connectivity (By similarity); Belongs to the TRAFAC class TrmE-Era-EngA-EngB-Septin- like GTPase superfamily. Septin GTPase family (429 aa)
Atp5k	Q8BTB6	0.230328	0.0124123	ATP synthase; H+-transporting; mitochondrial F1F0 complex; subunit E (MCG13600; isoform CRA_c)	ATP synthase subunit e, mitochondrial; Mitochondrial membrane ATP synthase (F(1)F(0) ATP synthase or Complex V) produces ATP from ADP in the presence of a proton gradient across the membrane which is generated by electron transport complexes of the respiratory chain. F-type ATPases consist of two structural domains, F(1) - containing the extramembraneous catalytic core, and F(0) - containing the …
Kif5b	Q61768	0.38385	0.0130574	Kinesin-1 heavy chain (Conventional kinesin heavy chain) (Ubiquitous kinesin heavy chain) (UKHC)	Kinesin-1 heavy chain; Microtubule-dependent motor required for normal distribution of mitochondria and lysosomes. May be involved in the mechanisms of growth arrest induced by exposure to DNA-damaging drugs or by cellular senescence. Can induce formation of neurite-like membrane protrusions in non-neuronal cells in a ZFYVE27-dependent manner. Regulates centrosome and nuclear positioning during m…
Gtpbp3	E9PWV7	0.322756	0.0130701	tRNA modification GTPase GTPBP3; mitochondrial	tRNA modification GTPase GTPBP3, mitochondrial; GTPase involved in the 5-carboxymethylaminomethyl modification (mnm(5)s(2)U34) of the wobble uridine base in mitochondrial tRNAs; Belongs to the TRAFAC class TrmE-Era-EngA-EngB-Septin- like GTPase superfamily. TrmE GTPase family (492 aa)
Sccpdh	J3QNN5	0.277982	0.0134503	Saccharopine dehydrogenase-like oxidoreductase	Saccharopine dehydrogenase-like oxidoreductase; Saccharopine dehydrogenase (putative); Belongs to the saccharopine dehydrogenase family (429 aa)
Slc1a2	P43006	0.537307	0.0140658	Excitatory amino acid transporter 2 (GLT-1) (Sodium-dependent glutamate/aspartate transporter 2) (Solute carrier family 1 member 2)	Excitatory amino acid transporter 2; Sodium-dependent, high-affinity amino acid transporter that mediates the uptake of L-glutamate and also L-aspartate and D-aspartate. Functions as a symporter that transports one amino acid molecule together with two or three Na(+) ions and one proton, in parallel with the counter-transport of one K(+) ion. Mediates Cl(-) flux that is not coupled to amino acid …
Atp1b2	I7HIF3	0.63577	0.0164437	ATPase; Na+/K+ transporting; beta 2 polypeptide (Sodium/potassium-transporting ATPase subunit beta-2) (Fragment)	Sodium/potassium-transporting ATPase subunit beta-2; This is the non-catalytic component of the active enzyme, which catalyzes the hydrolysis of ATP coupled with the exchange of Na(+) and K(+) ions across the plasma membrane. The exact function of the beta-2 subunit is not known (290 aa)
Slc7a5	Q9Z127	0.473221	0.0166331	Large neutral amino acids transporter small subunit 1 (4F2 light chain) (4F2 LC) (4F2LC) (L-type amino acid transporter 1) (Solute carrier family 7 member 5)	Large neutral amino acids transporter small subunit 1; Sodium-independent, high-affinity transport of large neutral amino acids such as phenylalanine, tyrosine, leucine, arginine and tryptophan, when associated with SLC3A2/4F2hc. Involved in cellular amino acid uptake. Acts as an amino acid exchanger. Involved in the transport of L-DOPA across the blood- brain barrier, and that of thyroid hormone…
Slc3a2	A0A0U1RPG5	0.439201	0.0172831	4F2 cell-surface antigen heavy chain (Fragment)	4F2 cell-surface antigen heavy chain; Required for the function of light chain amino-acid transporters. Involved in sodium-independent, high-affinity transport of large neutral amino acids such as phenylalanine, tyrosine, leucine, arginine and tryptophan. Involved in guiding and targeting of LAT1 and LAT2 to the plasma membrane. When associated with SLC7A6 or SLC7A7 acts as an arginine/glutamine …
Actr3	Q99JY9	1.66176	0.0174738	Actin-related protein 3 (Actin-like protein 3)	Actin-related protein 3; Functions as ATP-binding component of the Arp2/3 complex which is involved in regulation of actin polymerization and together with an activating nucleation-promoting factor (NPF) mediates the formation of branched actin networks. Seems to contact the pointed end of the daughter actin filament. Plays a role in ciliogenesis (By similarity); Belongs to the actin family. ARP3…
Fah	D3Z2R9	0.629789	0.0187807	Fumarylacetoacetase (Fragment)	Fumarylacetoacetase; Fumarylacetoacetate hydrolase; Belongs to the FAH family (419 aa)
Nipsnap2	Q7TMG8	2.15467	0.0189852	Glioblastoma amplified sequence (Protein NipSnap homolog 2)	Protein NipSnap homolog 2; May act as a positive regulator of L-type calcium channels (281 aa)
Dnajb11	Q99KV1	0.145793	0.0191173	DnaJ homolog subfamily B member 11 (APOBEC1-binding protein 2) (ABBP-2) (ER-associated DNAJ) (ER-associated Hsp40 co-chaperone) (Endoplasmic reticulum DNA J domain-containing protein 3) (ER-resident protein ERdj3) (ERdj3) (ERj3p)	DnaJ homolog subfamily B member 11; Serves as a co-chaperone for HSPA5. Binds directly to both unfolded proteins that are substrates for ERAD and nascent unfolded peptide chains, but dissociates from the HSPA5-unfolded protein complex before folding is completed. May help recruiting HSPA5 and other chaperones to the substrate. Stimulates HSPA5 ATPase activity (By similarity) (358 aa)
Tapbp	Q3TCU5	0.169396	0.0195537	Tapasin	Tapasin; Involved in the association of MHC class I with transporter associated with antigen processing (TAP) and in the assembly of MHC class I with peptide (peptide loading) (466 aa)
Ap2a2	P17427	1.82408	0.0197806	AP-2 complex subunit alpha-2 (100 kDa coated vesicle protein C) (Adaptor protein complex AP-2 subunit alpha-2) (Adaptor-related protein complex 2 subunit alpha-2) (Alpha-adaptin C) (Alpha2-adaptin) (Clathrin assembly protein complex 2 alpha-C large chain) (Plasma membrane adaptor HA2/AP2 adaptin alpha C subunit)	AP-2 complex subunit alpha-2; Component of the adaptor protein complex 2 (AP-2). Adaptor protein complexes function in protein transport via transport vesicles in different membrane traffic pathways. Adaptor protein complexes are vesicle coat components and appear to be involved in cargo selection and vesicle formation. AP-2 is involved in clathrin-dependent endocytosis in which cargo proteins ar…
Atp5j	P97450	1.74254	0.0200703	ATP synthase-coupling factor 6; mitochondrial (ATPase subunit F6)	ATP synthase-coupling factor 6, mitochondrial; Mitochondrial membrane ATP synthase (F(1)F(0) ATP synthase or Complex V) produces ATP from ADP in the presence of a proton gradient across the membrane which is generated by electron transport complexes of the respiratory chain. F-type ATPases consist of two structural domains, F(1) - containing the extramembraneous catalytic core and F(0) - containi…
Actn1	A1BN54	1.67142	0.0200927	Alpha actinin 1a (Alpha-actinin-1)	Alpha-actinin-1; F-actin cross-linking protein which is thought to anchor actin to a variety of intracellular structures. This is a bundling protein (By similarity) (892 aa)
Pls3	B1AX58	1.58733	0.0208938	Plastin-3	Plastin-3; Actin-bundling protein (630 aa)
Lmnb1	P14733	0.589602	0.0215331	Lamin-B1	Lamin-B1; Lamins are components of the nuclear lamina, a fibrous layer on the nucleoplasmic side of the inner nuclear membrane, which is thought to provide a framework for the nuclear envelope and may also interact with chromatin (588 aa)
Lama2	A0A087WRP2	0.363021	0.0226952	Laminin subunit alpha-2	Laminin subunit alpha-2; Binding to cells via a high affinity receptor, laminin is thought to mediate the attachment, migration and organization of cells into tissues during embryonic development by interacting with other extracellular matrix components (3118 aa)
Gng12	A0A0N4SW28	0.631038	0.0232336	Guanine nucleotide-binding protein subunit gamma	Guanine nucleotide-binding protein G(I)/G(S)/G(O) subunit gamma-12; Guanine nucleotide-binding proteins (G proteins) are involved as a modulator or transducer in various transmembrane signaling systems. The beta and gamma chains are required for the GTPase activity, for replacement of GDP by GTP, and for G protein- effector interaction (72 aa)
Acsf2	Q8VCW8	0.310673	0.0237719	Acyl-CoA synthetase family member 2; mitochondrial (EC 6.2.1.-)	Acyl-CoA synthetase family member 2, mitochondrial; Acyl-CoA synthases catalyze the initial reaction in fatty acid metabolism, by forming a thioester with CoA. Has some preference toward medium-chain substrates. Plays a role in adipocyte differentiation (615 aa)
Ina	P46660	0.645816	0.0249512	Alpha-internexin (Alpha-Inx) (66 kDa neurofilament protein) (NF-66) (Neurofilament-66)	Alpha-internexin; Class-IV neuronal intermediate filament that is able to self-assemble. It is involved in the morphogenesis of neurons. It may form an independent structural network without the involvement of other neurofilaments or it may cooperate with NF-L to form the filamentous backbone to which NF-M and NF-H attach to form the cross-bridges (By similarity) (501 aa)
Sv2a	Q9JIS5	2.28482	0.0256498	Synaptic vesicle glycoprotein 2A (Synaptic vesicle protein 2) (Synaptic vesicle protein 2A) (Calcium regulator SV2A)	Synaptic vesicle glycoprotein 2A; Plays a role in the control of regulated secretion in neural and endocrine cells, enhancing selectively low-frequency neurotransmission. Positively regulates vesicle fusion by maintaining the readily releasable pool of secretory vesicles (742 aa)
Sfxn3	Q3U4F0	1.60105	0.0258768	Sideroflexin-3	Sideroflexin-3; Potential iron transporter; Belongs to the sideroflexin family (321 aa)
Cap1	P40124	1.57725	0.0265151	Adenylyl cyclase-associated protein 1 (CAP 1)	Adenylyl cyclase-associated protein 1; Directly regulates filament dynamics and has been implicated in a number of complex developmental and morphological processes, including mRNA localization and the establishment of cell polarity (474 aa)
Prdx6	Q6GT24	0.700476	0.0270497	Peroxiredoxin-6	Peroxiredoxin-6; Thiol-specific peroxidase that catalyzes the reduction of hydrogen peroxide and organic hydroperoxides to water and alcohols, respectively. Can reduce H(2)O(2) and short chain organic, fatty acid, and phospholipid hydroperoxides. Also has phospholipase activity, and can therefore either reduce the oxidized sn-2 fatty acyl grup of phospholipids (peroxidase activity) or hydrolyze t…
Cstf2	A2AEK1	0.497223	0.0278173	AlphaCstF-64 variant 4 (Cleavage stimulation factor subunit 2)	Cleavage stimulation factor subunit 2; One of the multiple factors required for polyadenylation and 3’-end cleavage of mammalian pre-mRNAs. This subunit is directly involved in the binding to pre-mRNAs (By similarity) (580 aa)
Hp1bp3	Z4YKB8	0.532678	0.0286576	Heterochromatin protein 1-binding protein 3	Heterochromatin protein 1-binding protein 3; Component of heterochromatin that maintains heterochromatin integrity during G1/S progression and regulates the duration of G1 phase to critically influence cell proliferative capacity. May play a role in hypoxia-induced oncogenesis (554 aa)
Krt78	E9Q0F0	0.249309	0.0290193	Keratin 78	Keratin 78; Belongs to the intermediate filament family (1068 aa)
Ugt8a	Q64676	0.514957	0.0297295	2-hydroxyacylsphingosine 1-beta-galactosyltransferase (EC 2.4.1.47) (Ceramide UDP-galactosyltransferase) (Cerebroside synthase) (UDP-galactose-ceramide galactosyltransferase)	2-hydroxyacylsphingosine 1-beta-galactosyltransferase; Catalyzes the transfer of galactose to ceramide, a key enzymatic step in the biosynthesis of galactocerebrosides, which are abundant sphingolipids of the myelin membrane of the central nervous system and peripheral nervous system; Belongs to the UDP-glycosyltransferase family (541 aa)
Gstm1	A2AE89	0.647972	0.0297347	Glutathione S-transferase Mu 1	Glutathione S-transferase Mu 1; Conjugation of reduced glutathione to a wide number of exogenous and endogenous hydrophobic electrophiles (218 aa)
Cisd2	D3Z3X4	3.21482	0.0302665	CDGSH iron-sulfur domain-containing protein 2 (RIKEN cDNA 1500009M05; isoform CRA_b)	CDGSH iron-sulfur domain-containing protein 2; Regulator of autophagy that contributes to antagonize BECN1-mediated cellular autophagy at the endoplasmic reticulum. Participates in the interaction of BCL2 with BECN1 and is required for BCL2-mediated depression of endoplasmic reticulum Ca(2+) stores during autophagy. Contributes to BIK-initiated autophagy, while it is not involved in BIK-dependent…
Phb2	F6QPR1	2.97297	0.0307489	Prohibitin-2 (Fragment)	Prohibitin-2; Acts as a mediator of transcriptional repression by nuclear hormone receptors via recruitment of histone deacetylases. Functions as an estrogen receptor (ER)-selective coregulator that potentiates the inhibitory activities of antiestrogens and represses the activity of estrogens. Competes with NCOA1 for modulation of ER transcriptional activity. Probably involved in regulating mitoc…
Cpe	Q00493	0.610317	0.0316435	Carboxypeptidase E (CPE) (EC 3.4.17.10) (Carboxypeptidase H) (CPH) (Enkephalin convertase) (Prohormone-processing carboxypeptidase)	Carboxypeptidase E; Removes residual C-terminal Arg or Lys remaining after initial endoprotease cleavage during prohormone processing. Processes proinsulin (476 aa)
Prdx5	P99029	1.44071	0.0322354	Peroxiredoxin-5; mitochondrial (EC 1.11.1.15) (Antioxidant enzyme B166) (AOEB166) (Liver tissue 2D-page spot 2D-0014IV) (PLP) (Peroxiredoxin V) (Prx-V) (Peroxisomal antioxidant enzyme) (Thioredoxin peroxidase PMP20)	Peroxiredoxin-5, mitochondrial; Thiol-specific peroxidase that catalyzes the reduction of hydrogen peroxide and organic hydroperoxides to water and alcohols, respectively. Plays a role in cell protection against oxidative stress by detoxifying peroxides and as sensor of hydrogen peroxide-mediated signaling events; Belongs to the peroxiredoxin family. Prx5 subfamily (210 aa)
Kpna3	O35344	0.461404	0.0323111	Importin subunit alpha-4 (Importin alpha Q2) (Qip2) (Karyopherin subunit alpha-3)	Importin subunit alpha-4; Functions in nuclear protein import as an adapter protein for nuclear receptor KPNB1. Binds specifically and directly to substrates containing either a simple or bipartite NLS motif. Docking of the importin/substrate complex to the nuclear pore complex (NPC) is mediated by KPNB1 through binding to nucleoporin FxFG repeats and the complex is subsequently translocated thro…
Eif4e	A0A0G2JH04	0.397342	0.0329547	Eukaryotic translation initiation factor 4E	Eukaryotic translation initiation factor 4E; Recognizes and binds the 7-methylguanosine-containing mRNA cap during an early step in the initiation of protein synthesis and facilitates ribosome binding by inducing the unwinding of the mRNAs secondary structures. May play an important role in spermatogenesis through translational regulation of stage- specific mRNAs during germ cell development (By …
Krt10	A2A513	0.295606	0.0331598	Keratin; type I cytoskeletal 10	Keratin, type I cytoskeletal 10; Keratin 10; Belongs to the intermediate filament family (561 aa)
Cisd1	Q91WS0	0.19866	0.0342234	CDGSH iron-sulfur domain-containing protein 1 (MitoNEET)	CDGSH iron-sulfur domain-containing protein 1; Plays a key role in regulating maximal capacity for electron transport and oxidative phosphorylation. May be involved in Fe-S cluster shuttling and/or in redox reactions (By similarity); Belongs to the CISD protein family (108 aa)
Atic	Q9CWJ9	0.501224	0.0343271	Bifunctional purine biosynthesis protein PURH [Includes: Phosphoribosylaminoimidazolecarboxamide formyltransferase (EC 2.1.2.3) (5-aminoimidazole-4-carboxamide ribonucleotide formyltransferase) (AICAR transformylase); IMP cyclohydrolase (EC 3.5.4.10) (ATIC) (IMP synthase) (Inosinicase)]	Bifunctional purine biosynthesis protein PURH; Bifunctional enzyme that catalyzes 2 steps in purine biosynthesis; Belongs to the PurH family (592 aa)
Krt6b	Q3UV11	0.268792	0.0343634	Keratin; type II cytoskeletal 6B	Keratin, type II cytoskeletal 6B; Keratin 6B; Belongs to the intermediate filament family (554 aa)
Sh3bgrl3	Q91VW3	4.31254	0.0345334	SH3 domain-binding glutamic acid-rich-like protein 3	SH3 domain-binding glutamic acid-rich-like protein 3; Could act as a modulator of glutaredoxin biological activity (93 aa)
Hist2h2aa2	Q6GSS7	0.423011	0.0345336	Histone H2A type 2-A (H2a-614) (H2a-615) (Histone H2A.2)	Histone cluster 2, H2aa2 (130 aa)
mt-Atp8	P03930	0.614508	0.0348687	ATP synthase protein 8 (A6L) (F-ATPase subunit 8)	ATP synthase protein 8; Mitochondrial membrane ATP synthase (F(1)F(0) ATP synthase or Complex V) produces ATP from ADP in the presence of a proton gradient across the membrane which is generated by electron transport complexes of the respiratory chain. F-type ATPases consist of two structural domains, F(1) - containing the extramembraneous catalytic core and F(0) - containing the membrane proton …
Slc9a3r1	P70441	0.649773	0.0353936	Na(+)/H(+) exchange regulatory cofactor NHE-RF1 (NHERF-1) (Ezrin-radixin-moesin-binding phosphoprotein 50) (EBP50) (Regulatory cofactor of Na(+)/H(+) exchanger) (Sodium-hydrogen exchanger regulatory factor 1) (Solute carrier family 9 isoform A3 regulatory factor 1)	Na(+)/H(+) exchange regulatory cofactor NHE-RF1; Scaffold protein that connects plasma membrane proteins with members of the ezrin/moesin/radixin family and thereby helps to link them to the actin cytoskeleton and to regulate their surface expression. Necessary for recycling of internalized ADRB2. Was first known to play a role in the regulation of the activity and subcellular location of SLC9A3.…
Pea15a	Q62048	0.681843	0.0359729	Astrocytic phosphoprotein PEA-15 (15 kDa phosphoprotein enriched in astrocytes)	Astrocytic phosphoprotein PEA-15; Blocks Ras-mediated inhibition of integrin activation and modulates the ERK MAP kinase cascade. Inhibits RPS6KA3 activities by retaining it in the cytoplasm. Inhibits both TNFRSF6- and TNFRSF1A-mediated CASP8 activity and apoptosis. Regulates glucose transport by controlling both the content of SLC2A1 glucose transporters on the plasma membrane and the insulin-de…
Smap1	D3YVX4	2.07954	0.0360823	Stromal membrane-associated protein 1 (Stromal membrane-associated protein 1; isoform CRA_b)	Stromal membrane-associated protein 1; GTPase activating protein that acts on ARF6. Plays a role in clathrin-dependent endocytosis. May play a role in erythropoiesis (440 aa)
Slc9a3r2	A0A0R4J006	0.523574	0.036105	Na(+)/H(+) exchange regulatory cofactor NHE-RF2	Na(+)/H(+) exchange regulatory cofactor NHE-RF2; Scaffold protein that connects plasma membrane proteins with members of the ezrin/moesin/radixin family and thereby helps to link them to the actin cytoskeleton and to regulate their surface expression. Necessary for cAMP-mediated phosphorylation and inhibition of SLC9A3. May also act as scaffold protein in the nucleus (By similarity) (337 aa)
Vim	A0A0A6YWC8	1.67159	0.0381969	Vimentin	Vimentin; Vimentins are class-III intermediate filaments found in various non-epithelial cells, especially mesenchymal cells. Vimentin is attached to the nucleus, endoplasmic reticulum, and mitochondria, either laterally or terminally (466 aa)
Arpc1a	D3YVI5	0.679313	0.0387689	Actin-related protein 2/3 complex subunit 1A (Fragment)	Actin-related protein 2/3 complex subunit 1A; Probably functions as component of the Arp2/3 complex which is involved in regulation of actin polymerization and together with an activating nucleation-promoting factor (NPF) mediates the formation of branched actin networks (370 aa)
Gmfb	Q9CQI3	2.77715	0.0393874	Glia maturation factor beta (GMF-beta)	Glia maturation factor beta; This protein causes differentiation of brain cells, stimulation of neural regeneration, and inhibition of proliferation of tumor cells (142 aa)
Eps15l1	A0A1D5RLS1	0.272039	0.0397766	Epidermal growth factor receptor substrate 15-like 1	Epidermal growth factor receptor substrate 15-like 1; Seems to be a constitutive component of clathrin-coated pits that is required for receptor-mediated endocytosis. Involved in endocytosis of integrin beta-1 (ITGB1) and transferrin receptor (TFR); internalization of ITGB1 as DAB2-dependent cargo but not TFR seems to require association with DAB2 (By similarity) (907 aa)
Gda	Q9R111	1.98444	0.03984	Guanine deaminase (Guanase) (Guanine aminase) (EC 3.5.4.3) (Guanine aminohydrolase) (GAH)	Guanine deaminase; Catalyzes the hydrolytic deamination of guanine, producing xanthine and ammonia; Belongs to the metallo-dependent hydrolases superfamily. ATZ/TRZ family (454 aa)
Krt16	Q9Z2K1	0.377189	0.0412782	Keratin; type I cytoskeletal 16 (Cytokeratin-16) (CK-16) (Keratin-16) (K16)	Keratin, type I cytoskeletal 16; Epidermis-specific type I keratin that plays a key role in skin. Acts as a regulator of innate immunity in response to skin barrier breach- required for some inflammatory checkpoint for the skin barrier maintenance (469 aa)
Psmb2	Q9R1P3	1.59227	0.0414295	Proteasome subunit beta type-2 (EC 3.4.25.1) (Macropain subunit C7-I) (Multicatalytic endopeptidase complex subunit C7-I) (Proteasome component C7-I)	Proteasome subunit beta type-2; Component of the 20S core proteasome complex involved in the proteolytic degradation of most intracellular proteins. This complex plays numerous essential roles within the cell by associating with different regulatory particles. Associated with two 19S regulatory particles, forms the 26S proteasome and thus participates in the ATP-dependent degradation of ubiquitin…
Rap2b	P61226	0.675643	0.0435605	Ras-related protein Rap-2b	Ras-related protein Rap-2b; Small GTP-binding protein which cycles between a GDP- bound inactive and a GTP-bound active form. Involved in EGFR and CHRM3 signaling pathways through stimulation of PLCE1. May play a role in cytoskeletal rearrangements and regulate cell spreading through activation of the effector TNIK. May regulate membrane vesiculation in red blood cells (183 aa)
Calb2	Q8CCS7	2.29313	0.043668	Calbindin 2; isoform CRA_a (Calretinin)	Calretinin; Calretinin is a calcium-binding protein which is abundant in auditory neurons (271 aa)
Dpp3	E9PZF0	1.6848	0.0449621	Nucleoside diphosphate kinase (EC 2.7.4.6)	Dipeptidyl peptidase 3; Cleaves and degrades bioactive peptides, including angiotensin, Leu-enkephalin and Met-enkephalin. Also cleaves Arg- Arg-beta-naphthylamide (in vitro); Belongs to the peptidase M49 family (738 aa)
Sptb	Q3UGX2	0.511531	0.0449856	Spectrin beta chain	Spectrin beta chain, erythrocytic; Spectrin is the major constituent of the cytoskeletal network underlying the erythrocyte plasma membrane. It associates with band 4.1 and actin to form the cytoskeletal superstructure of the erythrocyte plasma membrane (2329 aa)
Myo1d	Q5SYD0	2.30108	0.045317	Unconventional myosin-Id	Unconventional myosin-Id; Myosins are actin-based motor molecules with ATPase activity. Unconventional myosins serve in intracellular movements. Their highly divergent tails are presumed to bind to membranous compartments, which would be moved relative to actin filaments (By similarity) (1006 aa)
Aldoc	P05063	0.658031	0.0454252	Fructose-bisphosphate aldolase C (EC 4.1.2.13) (Aldolase 3) (Brain-type aldolase) (Scrapie-responsive protein 2) (Zebrin II)	Aldolase C, fructose-bisphosphate (363 aa)
Eif4h	Q9WUK2	2.69772	0.0463308	Eukaryotic translation initiation factor 4H (eIF-4H) (Williams-Beuren syndrome chromosomal region 1 protein homolog)	Eukaryotic translation initiation factor 4H; Stimulates the RNA helicase activity of EIF4A in the translation initiation complex. Binds weakly mRNA (By similarity) (248 aa)
Rab7	P51150	0.710758	0.0464626	Ras-related protein Rab-7a	Ras-related protein Rab-7a; Key regulator in endo-lysosomal trafficking. Governs early-to-late endosomal maturation, microtubule minus-end as well as plus-end directed endosomal migration and positioning, and endosome-lysosome transport through different protein-protein interaction cascades. Plays a central role, not only in endosomal traffic, but also in many other cellular and physiological eve…
Dnm1l	E9PUD2	0.607049	0.0466732	Dynamin-1-like protein	Dynamin-1-like protein; Functions in mitochondrial and peroxisomal division. Mediates membrane fission through oligomerization into membrane- associated tubular structures that wrap around the scission site to constrict and sever the mitochondrial membrane through a GTP hydrolysis-dependent mechanism. Through its function in mitochondrial division, ensures the survival of at least some types of p…
Hagh	G5E8T9	2.80785	0.0476178	Hydroxyacyl glutathione hydrolase (Hydroxyacylglutathione hydrolase; mitochondrial)	Hydroxyacylglutathione hydrolase, mitochondrial; Thiolesterase that catalyzes the hydrolysis of S-D- lactoyl-glutathione to form glutathione and D-lactic acid (309 aa)
Actn4	A0A1L1SVJ6	1.75723	0.0476455	Alpha-actinin-4 (Fragment)	Alpha-actinin-4; F-actin cross-linking protein which is thought to anchor actin to a variety of intracellular structures. This is a bundling protein. Probably involved in vesicular trafficking via its association with the CART complex. The CART complex is necessary for efficient transferrin receptor recycling but not for EGFR degradation (By similarity). Involved in tight junction assembly in epi…
Pcbp2	Q61990	0.530208	0.0478347	Poly(rC)-binding protein 2 (Alpha-CP2) (CTBP) (CBP) (Putative heterogeneous nuclear ribonucleoprotein X) (hnRNP X)	Poly(rC)-binding protein 2; Single-stranded nucleic acid binding protein that binds preferentially to oligo dC. Major cellular poly(rC)-binding protein. Binds also poly(rU). Negatively regulates cellular antiviral responses mediated by MAVS signaling. It acts as an adapter between MAVS and the E3 ubiquitin ligase ITCH, therefore triggering MAVS ubiquitinationa and degradation (By similarity) (362…
Sh3bp1	P60487	1.60771	0.04785	Pyridoxal phosphate phosphatase (PLP phosphatase) (EC 3.1.3.3) (EC 3.1.3.74) (Chronophin)	SH3 domain-binding protein 1; GTPase activating protein (GAP) which specifically converts GTP-bound Rho-type GTPases including RAC1 and CDC42 in their inactive GDP-bound form. By specifically inactivating RAC1 at the leading edge of migrating cells, it regulates the spatiotemporal organization of cell protrusions which is important for proper cell migration. Also negatively regulates CDC42 in the…
Mefv	Q32MT0	0.541016	0.0484582	Mefv protein (Pyrin)	Pyrin; Involved in the regulation of innate immunity and the inflammatory response in response to IFNG/IFN-gamma. Organizes autophagic machinery by serving as a platform for the assembly of ULK1, Beclin 1/BECN1, ATG16L1, and ATG8 family members and recognizes specific autophagy targets, thus coordinating target recognition with assembly of the autophagic apparatus and initiation of autophagy. Act…
Abhd12	Q99LR1	2.67593	0.0486954	Monoacylglycerol lipase ABHD12 (EC 3.1.1.23) (2-arachidonoylglycerol hydrolase) (Abhydrolase domain-containing protein 12)	Monoacylglycerol lipase ABHD12; Lysophosphatidylserine (LPS) lipase that plays a key role in the central nervous system. Represents a major LPS lipase in the brain. May also have a 2- arachidonoylglycerol (2-AG) hydrolase activity and act as a regulator of endocannabinoid signaling pathways (398 aa)
Rps27	A0A0G2JEX7	0.4814	0.0489495	40S ribosomal protein S27	40S ribosomal protein S27; Component of the small ribosomal subunit (By similarity). Required for proper rRNA processing and maturation of 18S rRNAs (By similarity) (84 aa)
Vdac3	J3QMG3	1.35174	0.0493568	Voltage-dependent anion-selective channel protein 3	Voltage-dependent anion-selective channel protein 3; Forms a channel through the mitochondrial outer membrane that allows diffusion of small hydrophilic molecules (284 aa)
Esd	H3BLJ9	1.76646	0.0505307	S-formylglutathione hydrolase (EC 3.1.2.12)	S-formylglutathione hydrolase; Serine hydrolase involved in the detoxification of formaldehyde (282 aa)
Npepps	Q11011	0.652185	0.0521906	Puromycin-sensitive aminopeptidase (PSA) (EC 3.4.11.14) (Cytosol alanyl aminopeptidase) (AAP-S)	Puromycin-sensitive aminopeptidase; Aminopeptidase with broad substrate specificity for several peptides. Involved in proteolytic events essential for cell growth and viability. May act as regulator of neuropeptide activity. Plays a role in the antigen-processing pathway for MHC class I molecules. Involved in the N-terminal trimming of cytotoxic T-cell epitope precursors. Digests the poly-Q pepti…

## Sheet: Table S2_GO enrichment analysis
From list?	GO type	#term ID	false discovery rate	Level-1 description (STRING)	Level-2 description (REVIGO)	Level-3 description (consolidated)	observed gene count	background gene count	matching proteins in your network (labels)
Higher abundance in TAB	Component	GO:0031966	4.59e-05	mitochondrial membrane	mitochondrial part	mitochondria components	10	539	Aifm1,Atp5a1,Atp5j,Cisd2,Gbas,Ndufa11,Nme2,Phb2,Sfxn3,Vdac3
Higher abundance in TAB	Component	GO:0044429	4.59e-05	mitochondrial part	mitochondrial part	mitochondria components	12	854	Aifm1,Atp5a1,Atp5j,Cisd2,Gbas,Hagh,Ndufa11,Nme2,Phb2,Sfxn3,Sod2,Vdac3
Higher abundance in TAB	Component	GO:0032432	0.00053	actin filament bundle	mitochondrial part	mitochondria components	4	72	Actn1,Actn4,Pls3,Sept11
Higher abundance in TAB	Component	GO:0005741	0.00071	mitochondrial outer membrane	mitochondrial part	mitochondria components	5	165	Aifm1,Cisd2,Gbas,Phb2,Vdac3
Higher abundance in TAB	Component	GO:0030863	0.00075	cortical cytoskeleton	mitochondrial part	mitochondria components	4	85	Actn1,Actn4,Cap1,Spta1
Higher abundance in TAB	Component	GO:0005911	0.00075	cell-cell junction	cell-cell junction	cytoskeleton organisation / leading edge	7	417	Actn1,Actn4,Actr3,Calb2,Lims1,Sh3bp1,Sv2a
Higher abundance in TAB	Function	GO:0016790	0.0011	thiolester hydrolase activity	thiolester hydrolase activity	mitochondria components	4	44	Abhd12,Esd,Hagh,Hibch
Higher abundance in TAB	Function	GO:0003779	0.0011	actin binding	cytoskeletal protein binding	cytoskeleton organisation / leading edge	8	397	Actn1,Actn4,Actr3,Cap1,Gmfb,Myo1d,Pls3,Spta1
Higher abundance in TAB	Function	GO:0008092	0.0021	cytoskeletal protein binding	cytoskeletal protein binding	cytoskeleton organisation / leading edge	10	877	Actn1,Actn4,Actr3,Cap1,Dpysl4,Gmfb,Myo1d,Pls3,Spta1,Vapb
Higher abundance in TAB	Function	GO:0051015	0.0025	actin filament binding	cytoskeletal protein binding	cytoskeleton organisation / leading edge	5	163	Actn1,Actn4,Actr3,Myo1d,Pls3
Higher abundance in TAB	Component	GO:0031252	0.0032	cell leading edge	cell leading edge	cytoskeleton organisation / leading edge	6	393	Actn1,Actr3,Myo1d,Nme2,Sh3bp1,Vim
Higher abundance in TAB	Component	GO:0001725	0.0043	stress fiber	mitochondrial part	mitochondria components	3	63	Actn1,Actn4,Sept11
Higher abundance in TAB	Component	GO:0005844	0.0053	polysome	mitochondrial part	mitochondria components	3	71	Eif4h,Rpl18,Vim
Higher abundance in TAB	Component	GO:0001726	0.0053	ruffle	ruffle	cytoskeleton organisation / leading edge	4	168	Actn1,Actr3,Nme2,Sh3bp1
Higher abundance in TAB	Component	GO:0005743	0.0068	mitochondrial inner membrane	mitochondrial part	mitochondria components	5	321	Aifm1,Atp5a1,Atp5j,Ndufa11,Phb2
Higher abundance in TAB	Reactome	MMU-1592230	0.0079	Mitochondrial biogenesis			3	25	Atp5a1,Atp5j,Sod2
Higher abundance in TAB	Component	GO:0030424	0.009	axon	ruffle	cytoskeleton organisation / leading edge	7	712	Calb2,Myo1d,Phb2,Sept11,Spta1,Sv2a,Vim
Higher abundance in TAB	Component	GO:0005753	0.0091	mitochondrial proton-transporting ATP synthase complex	mitochondrial part	mitochondria components	2	21	Atp5a1,Atp5j
Higher abundance in TAB	Process	GO:0007015	0.0092	actin filament organization	supramolecular fiber organization	cytoskeleton organisation / leading edge	6	192	Actn1,Actn4,Actr3,Cap1,Pls3,Sh3bp1
Higher abundance in TAB	Process	GO:0046185	0.0092	aldehyde catabolic process	supramolecular fiber organization	cytoskeleton organisation / leading edge	3	13	Esd,Hagh,Sh3bp1
Higher abundance in TAB	Process	GO:0051017	0.0092	actin filament bundle assembly	supramolecular fiber organization	cytoskeleton organisation / leading edge	4	53	Actn1,Actn4,Pls3,Sh3bp1
Higher abundance in TAB	Process	GO:0097435	0.0092	supramolecular fiber organization	supramolecular fiber organization	cytoskeleton organisation / leading edge	7	384	Actn1,Actn4,Actr3,Cap1,Pls3,Sh3bp1,Vim
Lower abundance in TAB	Component	GO:0099513	1.96e-05	polymeric cytoskeletal fiber	polymeric cytoskeletal fiber	intermediate filament / cytoskeleton	12	581	Dnm1l,Gng12,Ina,Kif5b,Krt10,Krt16,Krt17,Krt6b,Lmnb1,Map1a,Mefv,Tppp
Lower abundance in TAB	Component	GO:0043209	2.2e-05	myelin sheath	myelin sheath	neuron projection / synapse	8	212	Atp1a1,Canx,Cldn11,Gstm1,Immt,Ina,Phgdh,Tppp
Lower abundance in TAB	Component	GO:0099512	7.46e-05	supramolecular fiber	polymeric cytoskeletal fiber	intermediate filament / cytoskeleton	13	809	Dnm1l,Gng12,Ina,Kif5b,Krt10,Krt16,Krt17,Krt6b,Lmnb1,Map1a,Mefv,Slc2a1,Tppp
Lower abundance in TAB	Component	GO:0005882	8.52e-05	intermediate filament	polymeric cytoskeletal fiber	intermediate filament / cytoskeleton	6	120	Ina,Krt10,Krt16,Krt17,Krt6b,Lmnb1
Lower abundance in TAB	Reactome	MMU-2559584	0.0002	Formation of Senescence-Associated Heterochromatin Foci (SAHF)			4	17	H1f0,Hist1h1b,Hist1h1c,Lmnb1
Lower abundance in TAB	Reactome	MMU-75153	0.0002	Apoptotic execution phase			5	48	Dnm1l,H1f0,Hist1h1b,Hist1h1c,Lmnb1
Lower abundance in TAB	Function	GO:0005198	0.00029	structural molecule activity	structural molecule activity	intermediate filament / cytoskeleton	11	546	Cldn11,Ina,Krt10,Krt16,Krt17,Krt6b,Lmnb1,Rps27,Slc9a3r1,Slc9a3r2,Sptb
Lower abundance in TAB	Component	GO:0016324	0.00033	apical plasma membrane	apical plasma membrane	apical membrane / import	8	339	Atp1a1,Atp1b2,Car4,Slc2a1,Slc3a2,Slc7a5,Slc9a3r1,Slc9a3r2
Lower abundance in TAB	Function	GO:0017111	0.00046	nucleoside-triphosphatase activity	GTPase activity	GTPase activity	12	714	Atp1a1,Atp1b2,Atp5k,Ddx39b,Dnm1l,Gng12,Gng5,Gtpbp3,Kif5b,Rab7,Rap2b,Rras2
Lower abundance in TAB	Process	GO:0045104	0.00048	intermediate filament cytoskeleton organization	intermediate filament cytoskeleton organization	intermediate filament / cytoskeleton	5	41	Ina,Krt10,Krt16,Krt17,Krt6b
Lower abundance in TAB	Component	GO:0045121	0.00062	membrane raft	membrane raft	apical membrane / import	8	374	Atp1a1,Cpe,Erlin2,Mapk1,Park7,Rap2b,Slc2a1,Slc9a3r1
Lower abundance in TAB	Component	GO:0044456	0.0011	synapse part	synapse part	neuron projection / synapse	11	809	Arhgap33,Atp1a1,Canx,Cpe,Dnm1l,Fabp5,Lama2,Map1a,Park7,Rab7,Slc1a2
Lower abundance in TAB	Component	GO:0000786	0.0012	nucleosome	polymeric cytoskeletal fiber	intermediate filament / cytoskeleton	4	67	H1f0,Hist1h1b,Hist1h1c,Hp1bp3
Lower abundance in TAB	Component	GO:0098800	0.0012	inner mitochondrial membrane protein complex	polymeric cytoskeletal fiber	intermediate filament / cytoskeleton	5	131	Atp5k,Cox7c,Immt,Park7,mt-Atp8
Lower abundance in TAB	Function	GO:0003924	0.0012	GTPase activity	GTPase activity	GTPase activity	7	255	Dnm1l,Gng12,Gng5,Gtpbp3,Rab7,Rap2b,Rras2
Lower abundance in TAB	Function	GO:0019900	0.0014	kinase binding	cytoskeletal protein binding	intermediate filament / cytoskeleton	11	737	Arhgap33,Arhgdia,Atp1a1,Gstm1,Kif5b,Lmnb1,Mapk1,Mvp,Park7,Pea15a,Slc2a1
Lower abundance in TAB	Function	GO:0008092	0.0014	cytoskeletal protein binding	cytoskeletal protein binding	intermediate filament / cytoskeleton	12	877	Aldoc,Arpc1a,Atp1a1,Dnm1l,Kif5b,Krt10,Map1a,Mefv,Myo18a,Slc9a3r1,Sptb,Tppp
Lower abundance in TAB	Component	GO:0120111	0.0018	neuron projection cytoplasm	neuron projection cytoplasm	neuron projection / synapse	4	79	Canx,Kif5b,Map1a,Mapk1
Lower abundance in TAB	Reactome	MMU-211227	0.002	Activation of DNA fragmentation factor			3	13	H1f0,Hist1h1b,Hist1h1c
Lower abundance in TAB	Reactome	MMU-382551	0.002	Transport of small molecules			10	624	Atp1a1,Atp1b2,Car4,Erlin2,Gng12,Gng5,Slc1a2,Slc2a1,Slc3a2,Slc7a5
Lower abundance in TAB	Reactome	MMU-210991	0.0024	Basigin interactions			3	22	Atp1b2,Slc3a2,Slc7a5
Lower abundance in TAB	Reactome	MMU-2559583	0.0024	Cellular Senescence			5	123	H1f0,Hist1h1b,Hist1h1c,Lmnb1,Mapk1
Lower abundance in TAB	Component	GO:0098794	0.0032	postsynapse	synapse part	neuron projection / synapse	8	514	Arhgap33,Atp1a1,Canx,Dnm1l,Fabp5,Lama2,Map1a,Slc1a2
Lower abundance in TAB	Process	GO:0009913	0.0035	epidermal cell differentiation	intermediate filament cytoskeleton organization	intermediate filament / cytoskeleton	6	143	Krt10,Krt16,Krt17,Krt6b,Slc9a3r1,Tsg101
Lower abundance in TAB	Process	GO:0098657	0.0035	import into cell	import into cell	apical membrane / import	10	516	Atp1a1,Atp1b2,Canx,Dnm1l,Eps15l1,Mapk1,Park7,Rab7,Slc1a2,Slc3a2
Lower abundance in TAB	Component	GO:0042470	0.004	melanosome	polymeric cytoskeletal fiber	intermediate filament / cytoskeleton	4	103	Canx,Rab7,Slc2a1,Slc3a2
Lower abundance in TAB	Component	GO:0045335	0.004	phagocytic vesicle	polymeric cytoskeletal fiber	intermediate filament / cytoskeleton	4	103	Kif5b,Myo18a,Rab7,Tapbp
Lower abundance in TAB	Process	GO:0030216	0.0041	keratinocyte differentiation	intermediate filament cytoskeleton organization	intermediate filament / cytoskeleton	5	88	Krt10,Krt16,Krt17,Krt6b,Tsg101
Lower abundance in TAB	Component	GO:0005890	0.0052	sodium:potassium-exchanging ATPase complex	apical plasma membrane	apical membrane / import	2	10	Atp1a1,Atp1b2
Lower abundance in TAB	Component	GO:0099568	0.0052	cytoplasmic region	polymeric cytoskeletal fiber	intermediate filament / cytoskeleton	7	439	Arhgap33,Canx,Kif5b,Map1a,Mapk1,Slc2a1,Sptb
Lower abundance in TAB	Reactome	MMU-456926	0.0056	Thrombin signalling through proteinase activated receptors (PARs)			3	32	Gng12,Gng5,Mapk1
Lower abundance in TAB	Reactome	MMU-109582	0.006	Hemostasis			8	489	Atp1b2,Gng12,Gng5,Kif5b,Mapk1,Sccpdh,Slc3a2,Slc7a5
Lower abundance in TAB	Component	GO:0005875	0.0064	microtubule associated complex	polymeric cytoskeletal fiber	intermediate filament / cytoskeleton	4	126	Kif5b,Map1a,Mefv,Pea15a
Lower abundance in TAB	Component	GO:0000276	0.0065	mitochondrial proton-transporting ATP synthase complex, coupling factor F(o)	polymeric cytoskeletal fiber	intermediate filament / cytoskeleton	2	12	Atp5k,mt-Atp8
Lower abundance in TAB	Reactome	MMU-6788656	0.0082	Histidine, lysine, phenylalanine, tyrosine, proline and tryptophan catabolism			3	39	Fah,Slc3a2,Slc7a5
Lower abundance in TAB	Component	GO:0042383	0.0098	sarcolemma	apical plasma membrane	apical membrane / import	4	147	Atp1a1,Car4,Lama2,Slc2a1
Lower abundance in TAB	Component	GO:0019866	0.0098	organelle inner membrane	polymeric cytoskeletal fiber	intermediate filament / cytoskeleton	6	373	Atp5k,Cox7c,Immt,Lmnb1,Park7,mt-Atp8

## Sheet: Table S3_PubMed enrichment
#term ID	Year	Title	observed gene count	background gene count	false discovery rate	matching proteins in the network	matching proteins in your network (labels)
PMID:22482456	2012	Biology of mitochondria in neurodegenerative diseases.	8	62	0.00036	ENSMUSP00000007012,ENSMUSP00000025083,ENSMUSP00000030805,ENSMUSP00000041104,ENSMUSP00000064699,ENSMUSP00000079100,ENSMUSP00000111415,ENSMUSP00000136273	Aifm1,Dnm1l,Kif5b,Park7,Slc1a2,Sod2,Vapb,Vdac3
PMID:21411865	2011	APC +- alters colonic fibroblast proteome in FAP.	6	33	0.0025	ENSMUSP00000020078,ENSMUSP00000030805,ENSMUSP00000063714,ENSMUSP00000065983,ENSMUSP00000066068,ENSMUSP00000071636	Actn4,Arhgdia,Lims1,Mapk1,Park7,Prdx6
PMID:19173612	2009	Temporal analysis of neural differentiation using quantitative proteomics.	6	42	0.0034	ENSMUSP00000013842,ENSMUSP00000028062,ENSMUSP00000029046,ENSMUSP00000041557,ENSMUSP00000045816,ENSMUSP00000130194	Fabp5,Hist1h1c,Pea15a,Slc3a2,Slc7a5,Vim
PMID:24009881	2012	Quantitative proteomics of extracellular vesicles derived from human primary and metastatic colorectal cancer cells.	9	139	0.0034	ENSMUSP00000014546,ENSMUSP00000020078,ENSMUSP00000028062,ENSMUSP00000030398,ENSMUSP00000039657,ENSMUSP00000099420,ENSMUSP00000109230,ENSMUSP00000130194,ENSMUSP00000137503	Actr3,Atp1a1,Krt10,Lims1,Rab7,Slc2a1,Slc3a2,Tsg101,Vim
PMID:25609920	2015	Plumbagin elicits differential proteomic responses mainly involving cell cycle, apoptosis, autophagy, and epithelial-to-mesenchymal transition pathways in human prostate cancer PC-3 and DU145 cells.	10	185	0.0034	ENSMUSP00000007012,ENSMUSP00000021554,ENSMUSP00000023608,ENSMUSP00000026495,ENSMUSP00000030805,ENSMUSP00000041104,ENSMUSP00000066068,ENSMUSP00000114304,ENSMUSP00000136273,ENSMUSP00000137503	Actn1,Actn4,Actr3,Aifm1,Aldh1l1,Atp5a1,Atp5j,Park7,Sod2,Vdac3
PMID:28685325	2017	Potential signaling pathways of acute endurance exercise-induced cardiac autophagy and mitophagy and its possible role in cardioprotection.	6	41	0.0034	ENSMUSP00000007012,ENSMUSP00000041104,ENSMUSP00000052283,ENSMUSP00000092223,ENSMUSP00000109230,ENSMUSP00000111415	Aifm1,Dnm1l,Lamp2,Map1a,Rab7,Sod2
PMID:26550561	2015	Evidence of Mitochondrial Dysfunction within the Complex Genetic Etiology of Schizophrenia.	9	165	0.0058	ENSMUSP00000002452,ENSMUSP00000023608,ENSMUSP00000026495,ENSMUSP00000030805,ENSMUSP00000066181,ENSMUSP00000080995,ENSMUSP00000113051,ENSMUSP00000114304,ENSMUSP00000115419	Aldh1l1,Atp5a1,Atp5j,Cox7c,Hagh,Immt,Ndufa11,Park7,mt-Atp8
PMID:22007191	2011	Targeted proteomics of isolated glomeruli from the kidneys of diabetic rats: sorbin and SH3 domain containing 2 is a novel protein associated with diabetic nephropathy.	5	26	0.0063	ENSMUSP00000021554,ENSMUSP00000028062,ENSMUSP00000033547,ENSMUSP00000066068,ENSMUSP00000137503	Actn1,Actn4,Actr3,Pls3,Vim
PMID:21407211	2011	RNAi screen of Salmonella invasion shows role of COPI in membrane targeting of cholesterol and Cdc42.	6	53	0.0064	ENSMUSP00000020637,ENSMUSP00000039657,ENSMUSP00000044251,ENSMUSP00000101862,ENSMUSP00000109230,ENSMUSP00000137503	Actr3,Atp1a1,Canx,Cap1,Dnajc6,Rab7
PMID:22792227	2012	Hippocampal CA1 transcriptional profile of sleep deprivation: relation to aging and stress.	8	126	0.0064	ENSMUSP00000003754,ENSMUSP00000025851,ENSMUSP00000030398,ENSMUSP00000064755,ENSMUSP00000079100,ENSMUSP00000087485,ENSMUSP00000099536,ENSMUSP00000111415	Aldoc,Calb2,Dnm1l,Dpp3,Gng5,Phgdh,Slc1a2,Slc2a1
PMID:26604869	2015	Label-free mass spectrometric analysis reveals complex changes in the brain proteome from the mdx-4cv mouse model of Duchenne muscular dystrophy.	6	52	0.0064	ENSMUSP00000003754,ENSMUSP00000025486,ENSMUSP00000028062,ENSMUSP00000039657,ENSMUSP00000047353,ENSMUSP00000109230	Atp1a1,Atp1b2,Calb2,Lmnb1,Rab7,Vim
PMID:22336941	2012	Keratin 16-null mice develop palmoplantar keratoderma, a hallmark feature of pachyonychia congenita and related disorders.	4	11	0.0066	ENSMUSP00000007280,ENSMUSP00000023786,ENSMUSP00000079699,ENSMUSP00000099420	Krt10,Krt16,Krt17,Krt6b
PMID:24946224	2014	Trypanosoma brucei histone H1 inhibits RNA polymerase I transcription and is important for parasite fitness in vivo.	4	12	0.0081	ENSMUSP00000003038,ENSMUSP00000045816,ENSMUSP00000079356,ENSMUSP00000137309	Ap2a2,H1f0,Hist1h1b,Hist1h1c
PMID:28399880	2017	Quantitative proteomic analysis of Parkin substrates in Drosophila neurons.	5	31	0.0081	ENSMUSP00000029815,ENSMUSP00000030805,ENSMUSP00000043559,ENSMUSP00000044251,ENSMUSP00000109230	Cisd1,Cisd2,Dnajc6,Park7,Rab7
PMID:29117123	2017	Metabolic Dysfunction and Oxidative Stress in Epilepsy.	4	12	0.0081	ENSMUSP00000007012,ENSMUSP00000030398,ENSMUSP00000041104,ENSMUSP00000079100	Aifm1,Slc1a2,Slc2a1,Sod2
PMID:22937046	2012	A multi-omics analysis of recombinant protein production in Hek293 cells.	7	98	0.0088	ENSMUSP00000020637,ENSMUSP00000021217,ENSMUSP00000029046,ENSMUSP00000041557,ENSMUSP00000048833,ENSMUSP00000130194,ENSMUSP00000137309	Canx,Eif4h,Fabp5,H1f0,Nme2,Slc3a2,Slc7a5
PMID:27288264	2016	Unbiased analysis of senescence associated secretory phenotype (SASP) to identify common components following different genotoxic stresses.	5	34	0.0097	ENSMUSP00000021554,ENSMUSP00000030805,ENSMUSP00000066068,ENSMUSP00000071636,ENSMUSP00000127250	Actn1,Actn4,Mvp,Park7,Prdx6
PMID:25740152	2015	Analysis of gene expression dynamics revealed delayed and abnormal epidermal repair process in aged compared to young skin.	4	14	0.0098	ENSMUSP00000007280,ENSMUSP00000023786,ENSMUSP00000099420,ENSMUSP00000115419	Cox7c,Krt10,Krt16,Krt6b
PMID:28794128	2017	Dynamic changes in H1 subtype composition during epigenetic reprogramming.	4	14	0.0098	ENSMUSP00000025486,ENSMUSP00000045816,ENSMUSP00000079356,ENSMUSP00000137309	H1f0,Hist1h1b,Hist1h1c,Lmnb1
PMID:21258649	2010	Mitochondrial and Cell Death Mechanisms in Neurodegenerative Diseases.	6	66	0.0104	ENSMUSP00000007012,ENSMUSP00000030805,ENSMUSP00000041104,ENSMUSP00000064699,ENSMUSP00000079100,ENSMUSP00000136273	Aifm1,Park7,Slc1a2,Sod2,Vapb,Vdac3
PMID:25208467	2014	Relocation of p25Alfatubulin polymerization promoting protein from the nucleus to the perinuclear cytoplasm in the oligodendroglia of sporadic and COQ2 mutant multiple system atrophy.	4	15	0.0106	ENSMUSP00000020637,ENSMUSP00000022057,ENSMUSP00000025486,ENSMUSP00000111415	Canx,Dnm1l,Lmnb1,Tppp
PMID:25340345	2014	Keratin 76 is required for tight junction function and maintenance of the skin barrier.	4	15	0.0106	ENSMUSP00000007280,ENSMUSP00000023786,ENSMUSP00000029046,ENSMUSP00000099420	Fabp5,Krt10,Krt16,Krt6b
PMID:24013129	2013	Isolation and analysis of linker histones across cellular compartments.	4	16	0.012	ENSMUSP00000025486,ENSMUSP00000045816,ENSMUSP00000079356,ENSMUSP00000137309	H1f0,Hist1h1b,Hist1h1c,Lmnb1
PMID:25662603	2015	HP1BP3 is a novel histone H1 related protein with essential roles in viability and growth.	4	16	0.012	ENSMUSP00000045816,ENSMUSP00000079356,ENSMUSP00000101453,ENSMUSP00000137309	H1f0,Hist1h1b,Hist1h1c,Hp1bp3
PMID:29074568	2017	Sendai virus recruits cellular villin to remodel actin cytoskeleton during fusion with hepatocytes.	4	16	0.012	ENSMUSP00000030805,ENSMUSP00000063714,ENSMUSP00000066068,ENSMUSP00000137503	Actn4,Actr3,Arhgdia,Park7
PMID:22608276	2012	Mitochondrial Ca(2+) and neurodegeneration.	5	40	0.0131	ENSMUSP00000007012,ENSMUSP00000030805,ENSMUSP00000064699,ENSMUSP00000079100,ENSMUSP00000111415	Dnm1l,Park7,Slc1a2,Sod2,Vapb
PMID:26758872	2016	Keratin 12 missense mutation induces the unfolded protein response and apoptosis in Meesmann epithelial corneal dystrophy.	5	40	0.0131	ENSMUSP00000007280,ENSMUSP00000023786,ENSMUSP00000079699,ENSMUSP00000099420,ENSMUSP00000126197	Krt10,Krt16,Krt17,Krt6b,Krt78
PMID:20096689	2010	Autophagy in cellular growth control.	5	41	0.0136	ENSMUSP00000029803,ENSMUSP00000041557,ENSMUSP00000065983,ENSMUSP00000109230,ENSMUSP00000130194	Eif4e,Mapk1,Rab7,Slc3a2,Slc7a5
PMID:20186695	2010	Keratin 6 expression correlates to areas of squamous differentiation in multiple independent isolates of As(+3)-induced bladder cancer.	3	4	0.0136	ENSMUSP00000007280,ENSMUSP00000023786,ENSMUSP00000079699	Krt16,Krt17,Krt6b
PMID:20016704	2009	Mechanisms of amino acid sensing in mTOR signaling pathway.	4	18	0.0138	ENSMUSP00000029803,ENSMUSP00000041557,ENSMUSP00000109230,ENSMUSP00000130194	Eif4e,Rab7,Slc3a2,Slc7a5
PMID:20224768	2010	Disruption of astrocyte STAT3 signaling decreases mitochondrial function and increases oxidative stress in vitro.	4	18	0.0138	ENSMUSP00000007012,ENSMUSP00000025904,ENSMUSP00000030805,ENSMUSP00000071636	Park7,Prdx5,Prdx6,Sod2
PMID:27934942	2016	Defective Acetylcholine Receptor Subunit Switch Precedes Atrophy of Slow-Twitch Skeletal Muscle Fibers Lacking ERK12 Kinases in Soleus Muscle.	4	19	0.0156	ENSMUSP00000007012,ENSMUSP00000037576,ENSMUSP00000065983,ENSMUSP00000111415	Dnm1l,Mapk1,Sod2,Sv2a
PMID:22394374	2012	Sex differences in brain proteomes of neuron-specific STAT3-null mice after cerebral ischemiareperfusion.	5	44	0.0158	ENSMUSP00000007012,ENSMUSP00000021217,ENSMUSP00000030651,ENSMUSP00000071636,ENSMUSP00000099536	Aldoc,Nme2,Prdx6,Sh3bgrl3,Sod2
PMID:12900395	2003	Hrs regulates multivesicular body formation via ESCRT recruitment to endosomes.	3	5	0.017	ENSMUSP00000014546,ENSMUSP00000052283,ENSMUSP00000064755	Lamp2,Phgdh,Tsg101
PMID:16420690	2006	The inflammatory and normal transcriptome of mouse bladder detrusor and mucosa.	5	45	0.017	ENSMUSP00000004140,ENSMUSP00000033547,ENSMUSP00000048555,ENSMUSP00000052283,ENSMUSP00000137503	Actr3,Cpe,Gstm1,Lamp2,Pls3
PMID:17851587	2008	Mice expressing a mutant Krt75 (K6hf) allele develop hair and nail defects resembling pachyonychia congenita.	3	5	0.017	ENSMUSP00000007280,ENSMUSP00000023786,ENSMUSP00000079699	Krt16,Krt17,Krt6b
PMID:19651206	2010	The mitochondrial permeability transition pore: a molecular target for amyotrophic lateral sclerosis therapy.	4	24	0.017	ENSMUSP00000007012,ENSMUSP00000041104,ENSMUSP00000079100,ENSMUSP00000136273	Aifm1,Slc1a2,Sod2,Vdac3
PMID:20838473	2010	Mitochondrial preconditioning: a potential neuroprotective strategy.	4	20	0.017	ENSMUSP00000007012,ENSMUSP00000030805,ENSMUSP00000041104,ENSMUSP00000111415	Aifm1,Dnm1l,Park7,Sod2
PMID:20920792	2010	Snapin-regulated late endosomal transport is critical for efficient autophagy-lysosomal function in neurons.	4	22	0.017	ENSMUSP00000020637,ENSMUSP00000025083,ENSMUSP00000052283,ENSMUSP00000109230	Canx,Kif5b,Lamp2,Rab7
PMID:21343306	2011	Membrane-associated ubiquitin ligase complex containing gp78 mediates sterol-accelerated degradation of 3-hydroxy-3-methylglutaryl-coenzyme A reductase.	4	20	0.017	ENSMUSP00000003038,ENSMUSP00000020637,ENSMUSP00000033873,ENSMUSP00000041104	Aifm1,Ap2a2,Canx,Erlin2
PMID:22006949	2011	Energy determinants GAPDH and NDPK act as genetic modifiers for hepatocyte inclusion formation.	4	24	0.017	ENSMUSP00000004140,ENSMUSP00000025486,ENSMUSP00000032865,ENSMUSP00000071636	Fah,Gstm1,Lmnb1,Prdx6
PMID:22070562	2012	Selective oestrogen receptor modulators differentially potentiate brain mitochondrial function.	4	23	0.017	ENSMUSP00000007012,ENSMUSP00000020637,ENSMUSP00000025904,ENSMUSP00000137309	Canx,H1f0,Prdx5,Sod2
PMID:22393359	2012	Continuous versus cyclic progesterone exposure differentially regulates hippocampal gene expression and functional profiles.	5	52	0.017	ENSMUSP00000007012,ENSMUSP00000025904,ENSMUSP00000026495,ENSMUSP00000065983,ENSMUSP00000111415	Atp5a1,Dnm1l,Mapk1,Prdx5,Sod2
PMID:22539942	2012	A proteomic view at T cell costimulation.	6	85	0.017	ENSMUSP00000007012,ENSMUSP00000020078,ENSMUSP00000021554,ENSMUSP00000030651,ENSMUSP00000063714,ENSMUSP00000137503	Actn1,Actr3,Arhgdia,Lims1,Sh3bgrl3,Sod2
PMID:22655043	2012	Shifting the paradigm: the putative mitochondrial protein ABCB6 resides in the lysosomes of cells and in the plasma membrane of erythrocytes.	4	24	0.017	ENSMUSP00000014546,ENSMUSP00000020637,ENSMUSP00000027817,ENSMUSP00000052283	Canx,Lamp2,Spta1,Tsg101
PMID:23334578	2013	Molecular architecture of the chick vestibular hair bundle.	6	84	0.017	ENSMUSP00000002572,ENSMUSP00000021077,ENSMUSP00000026495,ENSMUSP00000028062,ENSMUSP00000033547,ENSMUSP00000039657	Atp1a1,Atp5a1,Pls3,Slc9a3r1,Slc9a3r2,Vim
PMID:23750203	2013	Protective effects of andrographolide analogue AL-1 on ROS-induced RIN-mBeta cell death by inducing ROS generation.	4	23	0.017	ENSMUSP00000007012,ENSMUSP00000025904,ENSMUSP00000030805,ENSMUSP00000063714	Arhgdia,Park7,Prdx5,Sod2
PMID:24116231	2013	Optimal differentiation of in vitro keratinocytes requires multifactorial external control.	4	22	0.017	ENSMUSP00000007280,ENSMUSP00000028062,ENSMUSP00000079699,ENSMUSP00000099420	Krt10,Krt16,Krt17,Vim
PMID:24117181	2014	Unravelling mitochondrial pathways to Parkinson's disease.	4	22	0.017	ENSMUSP00000007012,ENSMUSP00000030805,ENSMUSP00000052283,ENSMUSP00000111415	Dnm1l,Lamp2,Park7,Sod2
PMID:24288463	2013	Mitochondrial quality control: decommissioning power plants in neurodegenerative diseases.	5	49	0.017	ENSMUSP00000007012,ENSMUSP00000030805,ENSMUSP00000066181,ENSMUSP00000092223,ENSMUSP00000111415	Dnm1l,Immt,Map1a,Park7,Sod2
PMID:24412988	2014	p53 and mitochondrial function in neurons.	5	53	0.017	ENSMUSP00000007012,ENSMUSP00000041104,ENSMUSP00000052283,ENSMUSP00000066181,ENSMUSP00000111415	Aifm1,Dnm1l,Immt,Lamp2,Sod2
PMID:24844246	2014	Pharmacological inhibition of cystine-glutamate exchange induces endoplasmic reticulum stress and ferroptosis.	4	20	0.017	ENSMUSP00000029803,ENSMUSP00000041557,ENSMUSP00000130194,ENSMUSP00000134178	Ddx39b,Eif4e,Slc3a2,Slc7a5
PMID:24922074	2014	Loss of function of the ALS protein SigR1 leads to ER pathology associated with defective autophagy and lipid raft disturbances.	4	23	0.017	ENSMUSP00000014546,ENSMUSP00000033873,ENSMUSP00000064699,ENSMUSP00000109230	Erlin2,Rab7,Tsg101,Vapb
PMID:25075203	2014	Colorectal cancer derived organotypic spheroids maintain essential tissue characteristics but adapt their metabolism in culture.	6	82	0.017	ENSMUSP00000004140,ENSMUSP00000004375,ENSMUSP00000007012,ENSMUSP00000025486,ENSMUSP00000028062,ENSMUSP00000048833	Eif4h,Gstm1,Lmnb1,Phb2,Sod2,Vim
PMID:25420111	2014	Proteomic analysis of the effects of aged garlic extract and its FruArg component on lipopolysaccharide-induced neuroinflammatory response in microglial cells.	4	22	0.017	ENSMUSP00000007012,ENSMUSP00000030805,ENSMUSP00000063714,ENSMUSP00000064755	Arhgdia,Park7,Phgdh,Sod2
PMID:25640959	2015	Mitochondrial Diseases Part II: Mouse models of OXPHOS deficiencies caused by defects in regulatory factors and other components required for mitochondrial function.	5	48	0.017	ENSMUSP00000004375,ENSMUSP00000007012,ENSMUSP00000041104,ENSMUSP00000066181,ENSMUSP00000111415	Aifm1,Dnm1l,Immt,Phb2,Sod2
PMID:25664862	2015	Analysis of dermal papilla cell interactome using STRING database to profile the ex vivo hair growth inhibition effect of a vinca alkaloid drug, colchicine.	5	51	0.017	ENSMUSP00000020637,ENSMUSP00000026495,ENSMUSP00000028062,ENSMUSP00000030805,ENSMUSP00000071636	Atp5a1,Canx,Park7,Prdx6,Vim
PMID:25688865	2015	Cleavage of host cytokeratin-6 by lysine-specific gingipain induces gingival inflammation in periodontitis patients.	4	23	0.017	ENSMUSP00000007280,ENSMUSP00000023786,ENSMUSP00000079699,ENSMUSP00000099420	Krt10,Krt16,Krt17,Krt6b
PMID:25929859	2015	DRAM-3 modulates autophagy and promotes cell survival in the absence of glucose.	4	20	0.017	ENSMUSP00000020637,ENSMUSP00000052283,ENSMUSP00000092223,ENSMUSP00000109230	Canx,Lamp2,Map1a,Rab7
PMID:26052702	2015	BIG3 Inhibits the Estrogen-Dependent Nuclear Translocation of PHB2 via Multiple Karyopherin-Alpha Proteins in Breast Cancer Cells.	4	20	0.017	ENSMUSP00000004375,ENSMUSP00000021217,ENSMUSP00000022496,ENSMUSP00000025486	Kpna3,Lmnb1,Nme2,Phb2
PMID:26251673	2015	Proteogenomic analysis of psoriasis reveals discordant and concordant changes in mRNA and protein abundance.	6	90	0.017	ENSMUSP00000029046,ENSMUSP00000029803,ENSMUSP00000063714,ENSMUSP00000079699,ENSMUSP00000099420,ENSMUSP00000132102	Arhgdia,Eif4e,Fabp5,Krt10,Krt17,Rps27
PMID:27076075	2016	Amino Acid Sensing by mTORC1: Intracellular Transporters Mark the Spot.	4	24	0.017	ENSMUSP00000052283,ENSMUSP00000095197,ENSMUSP00000109230,ENSMUSP00000130194	Lamp2,Lars,Rab7,Slc3a2
PMID:27089221	2016	Differential Expression of Vitreous Proteins in Young and Mature New Zealand White Rabbits.	4	20	0.017	ENSMUSP00000004140,ENSMUSP00000026551,ENSMUSP00000028062,ENSMUSP00000099483	Car4,Dpysl4,Gstm1,Vim
PMID:27452463	2016	Comprehensive Proteomic Analysis of Human Erythropoiesis.	5	52	0.017	ENSMUSP00000021458,ENSMUSP00000027817,ENSMUSP00000029803,ENSMUSP00000030398,ENSMUSP00000137309	Eif4e,H1f0,Slc2a1,Spta1,Sptb
PMID:28222538	2017	VPS35, the Retromer Complex and Parkinson's Disease.	5	45	0.017	ENSMUSP00000030805,ENSMUSP00000044251,ENSMUSP00000052283,ENSMUSP00000109230,ENSMUSP00000111415	Dnajc6,Dnm1l,Lamp2,Park7,Rab7
PMID:28638048	2017	Maternal folate deficiency causes inhibition of mTOR signaling, down-regulation of placental amino acid transporters and fetal growth restriction in mice.	4	24	0.017	ENSMUSP00000029803,ENSMUSP00000041557,ENSMUSP00000052283,ENSMUSP00000109230	Eif4e,Lamp2,Rab7,Slc7a5
PMID:29073103	2017	Packaging and transfer of mitochondrial DNA via exosomes regulate escape from dormancy in hormonal therapy-resistant breast cancer.	4	21	0.017	ENSMUSP00000014546,ENSMUSP00000025904,ENSMUSP00000026495,ENSMUSP00000080995	Atp5a1,Prdx5,Tsg101,mt-Atp8
PMID:29352283	2018	Using a model comparison approach to describe the assembly pathway for histone H1.	3	6	0.017	ENSMUSP00000045816,ENSMUSP00000079356,ENSMUSP00000137309	H1f0,Hist1h1b,Hist1h1c
PMID:29422612	2018	Csde1 binds transcripts involved in protein homeostasis and controls their expression in an erythroid cell line.	5	53	0.017	ENSMUSP00000001480,ENSMUSP00000031625,ENSMUSP00000064755,ENSMUSP00000066068,ENSMUSP00000113051	Actn4,Arpc1a,Hagh,Npepps,Phgdh
PMID:6848501	1983	The histone H1 complements of dividing and nondividing cells of the mouse.	3	6	0.017	ENSMUSP00000045816,ENSMUSP00000079356,ENSMUSP00000137309	H1f0,Hist1h1b,Hist1h1c
PMID:7989039	1994	Expression and chromosomal mapping of the gene encoding the human histone H1.1.	3	5	0.017	ENSMUSP00000045816,ENSMUSP00000079356,ENSMUSP00000137309	H1f0,Hist1h1b,Hist1h1c
PMID:8424946	1993	G1- and S-phase synthesis of histone H1 subtypes from mouse NIH fibroblasts and rat C6 glioma cells.	3	6	0.017	ENSMUSP00000045816,ENSMUSP00000079356,ENSMUSP00000137309	H1f0,Hist1h1b,Hist1h1c
PMID:8639656	1996	In vivo phosphorylation of histone H1 variants during the cell cycle.	3	6	0.017	ENSMUSP00000045816,ENSMUSP00000079356,ENSMUSP00000137309	H1f0,Hist1h1b,Hist1h1c
PMID:9067599	1997	Chromatin modifications during oogenesis in the mouse: removal of somatic subtypes of histone H1 from oocyte chromatin occurs post-natally through a post-transcriptional mechanism.	3	6	0.017	ENSMUSP00000045816,ENSMUSP00000079356,ENSMUSP00000137309	H1f0,Hist1h1b,Hist1h1c
PMID:11479299	2001	Hormone-mediated dephosphorylation of specific histone H1 isoforms.	3	7	0.0173	ENSMUSP00000045816,ENSMUSP00000079356,ENSMUSP00000137309	H1f0,Hist1h1b,Hist1h1c
PMID:12606334	2003	Mouse oocytes and early embryos express multiple histone H1 subtypes.	3	7	0.0173	ENSMUSP00000045816,ENSMUSP00000079356,ENSMUSP00000137309	H1f0,Hist1h1b,Hist1h1c
PMID:1690730	1990	Subtype-specific cyclic AMP-dependent histone H1 phosphorylation at the differentiation of mouse neuroblastoma cells.	3	7	0.0173	ENSMUSP00000045816,ENSMUSP00000079356,ENSMUSP00000137309	H1f0,Hist1h1b,Hist1h1c
PMID:22816983	2012	Comparative protein interactomics of neuroglobin and myoglobin.	4	25	0.0173	ENSMUSP00000030805,ENSMUSP00000041104,ENSMUSP00000092223,ENSMUSP00000097444	Aifm1,Map1a,Park7,Prep
PMID:25343061	2013	Role of Mitochondria in Alcoholic Liver Disease.	4	25	0.0173	ENSMUSP00000007012,ENSMUSP00000041104,ENSMUSP00000066181,ENSMUSP00000111415	Aifm1,Dnm1l,Immt,Sod2
PMID:26217688	2014	Sequence conservation of linker histones between chicken and mammalian species.	3	7	0.0173	ENSMUSP00000045816,ENSMUSP00000079356,ENSMUSP00000137309	H1f0,Hist1h1b,Hist1h1c
PMID:27222353	2016	Screening and identification of the differentially expressed proteins in neonatal rat kidney after partial unilateral ureteral obstruction.	4	25	0.0173	ENSMUSP00000003038,ENSMUSP00000020637,ENSMUSP00000030805,ENSMUSP00000137503	Actr3,Ap2a2,Canx,Park7
PMID:28494858	2017	mTORC1 Balances Cellular Amino Acid Supply with Demand for Protein Synthesis through Post-transcriptional Control of ATF4.	4	25	0.0173	ENSMUSP00000029803,ENSMUSP00000041557,ENSMUSP00000064755,ENSMUSP00000130194	Eif4e,Phgdh,Slc3a2,Slc7a5
PMID:29357356	2018	Genetic variants in pachyonychia congenita-associated keratins increase susceptibility to tooth decay.	3	7	0.0173	ENSMUSP00000007280,ENSMUSP00000023786,ENSMUSP00000079699	Krt16,Krt17,Krt6b
PMID:9300059	1997	The mouse histone H1 genes: gene organization and differential regulation.	3	7	0.0173	ENSMUSP00000045816,ENSMUSP00000079356,ENSMUSP00000137309	H1f0,Hist1h1b,Hist1h1c
PMID:20140087	2010	Comprehensive identification and modified-site mapping of S-nitrosylated targets in prostate epithelial cells.	6	95	0.0174	ENSMUSP00000020637,ENSMUSP00000021554,ENSMUSP00000025486,ENSMUSP00000028062,ENSMUSP00000066068,ENSMUSP00000136273	Actn1,Actn4,Canx,Lmnb1,Vdac3,Vim
PMID:22187934	2012	Autophagy, mitochondria and oxidative stress: cross-talk and redox signalling.	5	56	0.0174	ENSMUSP00000030805,ENSMUSP00000041104,ENSMUSP00000052283,ENSMUSP00000109230,ENSMUSP00000111415	Aifm1,Dnm1l,Lamp2,Park7,Rab7
PMID:23259056	2012	The bacterial and cellular determinants controlling the recruitment of mTOR to the Salmonella-containing vacuole.	4	26	0.0174	ENSMUSP00000041557,ENSMUSP00000052283,ENSMUSP00000109230,ENSMUSP00000130194	Lamp2,Rab7,Slc3a2,Slc7a5
PMID:23319141	2013	The proteomic investigation of chromatin functional domains reveals novel synergisms among distinct heterochromatin components.	4	26	0.0174	ENSMUSP00000045816,ENSMUSP00000079356,ENSMUSP00000101453,ENSMUSP00000137309	H1f0,Hist1h1b,Hist1h1c,Hp1bp3
PMID:24337580	2014	Amino acids activate mammalian target of rapamycin (mTOR) complex 1 without changing Rag GTPase guanyl nucleotide charging.	4	26	0.0174	ENSMUSP00000020637,ENSMUSP00000052283,ENSMUSP00000095197,ENSMUSP00000109230	Canx,Lamp2,Lars,Rab7
PMID:25695600	2015	Structural and biochemical changes underlying a keratoderma-like phenotype in mice lacking suprabasal AP1 transcription factor function.	5	56	0.0174	ENSMUSP00000007280,ENSMUSP00000023786,ENSMUSP00000029046,ENSMUSP00000079699,ENSMUSP00000099420	Fabp5,Krt10,Krt16,Krt17,Krt6b
PMID:25741943	2015	Role of protein kinase A in regulating mitochondrial function and neuronal development: implications to neurodegenerative diseases.	4	26	0.0174	ENSMUSP00000007012,ENSMUSP00000020637,ENSMUSP00000092223,ENSMUSP00000111415	Canx,Dnm1l,Map1a,Sod2
PMID:27533791	2016	ERAlfa-XPO1 Cross Talk Controls Tamoxifen Sensitivity in Tumors by Altering ERK5 Cellular Localization.	4	27	0.0186	ENSMUSP00000021217,ENSMUSP00000022496,ENSMUSP00000025486,ENSMUSP00000065983	Kpna3,Lmnb1,Mapk1,Nme2
PMID:28540740	2017	The Incomplete Glutathione Puzzle: Just Guessing at Numbers and Figures?	4	27	0.0186	ENSMUSP00000025904,ENSMUSP00000030805,ENSMUSP00000071636,ENSMUSP00000113051	Hagh,Park7,Prdx5,Prdx6
PMID:29233179	2017	Immature morphological properties in subcellular-scale structures in the dentate gyrus of Schnurri-2 knockout mice: a model for schizophrenia and intellectual disability.	4	27	0.0186	ENSMUSP00000037576,ENSMUSP00000051222,ENSMUSP00000064755,ENSMUSP00000111415	Atp5k,Dnm1l,Phgdh,Sv2a
PMID:18662334	2008	Gene inactivation of Na+H+ exchanger isoform 1 attenuates apoptosis and mitochondrial damage following transient focal cerebral ischemia.	3	8	0.0187	ENSMUSP00000007012,ENSMUSP00000041104,ENSMUSP00000137309	Aifm1,H1f0,Sod2
PMID:19152501	2009	Pink1 forms a multiprotein complex with Miro and Milton, linking Pink1 function to mitochondrial trafficking.	3	8	0.0187	ENSMUSP00000020637,ENSMUSP00000030805,ENSMUSP00000066181	Canx,Immt,Park7
PMID:22848576	2012	Low-dose alcohol consumption protects against transient focal cerebral ischemia in mice: possible role of PPARGamma.	3	8	0.0187	ENSMUSP00000007012,ENSMUSP00000041104,ENSMUSP00000079100	Aifm1,Slc1a2,Sod2
PMID:24048372	2014	Exome sequencing and in vitro studies identified podocalyxin as a candidate gene for focal and segmental glomerulosclerosis.	3	8	0.0187	ENSMUSP00000002572,ENSMUSP00000021077,ENSMUSP00000066068	Actn4,Slc9a3r1,Slc9a3r2
PMID:24085372	2013	Oligodendroglioma cells synthesize the differentiation-specific linker histone H1* and release it into the extracellular environment through shed vesicles.	3	8	0.0187	ENSMUSP00000045816,ENSMUSP00000079356,ENSMUSP00000137309	H1f0,Hist1h1b,Hist1h1c
PMID:26912086	2016	Regulations of Reversal of Senescence by PKC Isozymes in Response to 12-O-Tetradecanoylphorbol-13-Acetate via Nuclear Translocation of pErk12.	3	8	0.0187	ENSMUSP00000013842,ENSMUSP00000025486,ENSMUSP00000065983	Lmnb1,Mapk1,Pea15a

## Sheet: Table S4_IHC details
Antigen	Antibody clone	Target tissue	Antigen Retrieval	Blocking	Primary staining cond's	Secondary staining cond's	Detection (chromogenic IHC)	Detection (fmIHC)
Arhgap33	Abcam Ab224477	Human	Citrate pH 6.0, 30 min 95oC	Sniper/BSA; 10 min	1:100 4oC O/N	MACH2 Rabbit (30 min)	DAB 5 min	np
Arhgap33	Abcam Ab224477	Mouse	Citrate pH 6.0, 30 min 95oC	Sniper/BSA; 10 min	1:250, 30 min, RT	MACH2 Rabbit (30 min)	np	Opal 520; 10 min
Hibch	Abcam Ab231820	Human	Citrate pH 6.0, 30 min 95oC	Sniper/BSA; 10 min	1:100 4oC O/N	MACH2 Rabbit (30 min)	DAB 2 min	np
Hibch	Abcam Ab231820	Mouse	Citrate pH 6.0 mw 15 min	Sniper/BSA; 10 min	1:2500 30 min, RT	MACH2 Rabbit (15 min)	np	Opal 570; 10 min
Claudin 11	Abcam Ab53041	Human	Citrate pH 6.0; 30 min 95oC	Sniper/BSA; 10 min	1:250 4oC O/N	MACH2 Rabbit (30 min)	DAB 5 min	np
Claudin 11	Abcam Ab53041	Mouse	Citrate pH 6.0; mw 15 min	Sniper/BSA; 10 min	1:5000 30 min, RT	MACH2 Rabbit (15 min)	np	Opal 620; 10 min
GFAP	Dako Z033401	Mouse	Citrate pH 6.0; mw 15 min	Sniper/BSA; 10 min	1:12000; 30 min, RT	MACH2 Rabbit (15 min)	np	Opal 690; 10 min
BSA, bovine serum albumin; np, not performed; mw, microwave; O/N, overnight
